# Supplementary material for: Pollution in the Press: Employing Text Analytics to Understand Regional Water Quality Narratives
Source: Frontiers journal article supplement (doi:10.3389/fenvs.2022.770812), 2022-04-27
Supplement: Data_Sheet_1.XLSX [file Data_Sheet_1.XLSX]

## Sheet: ReadMe
Background:
This dataset captures news distribution data, news coverage counts by Safe Drinking Water Act (SDWA) Rule, demographics of distribution regions, and SDWA Rule violations occurring in each distribution region associated with the analyses and visualizations for the manuscript entitled, "Pollution in the Press: Employing Text Analytics to Understand Regional Water Quality Narratives".
Overview of Excel Sheets:
NewsDistribution: Newspaper distribution information including newspaper name, city of publication, county of distribution, and Sunday circulation size.
NewsCounts: Newspaper name, year, and number of articles published per SDWA rule.
DistributionDemographics: Median sociodemographic values for news distribution regions.
DistributionViolations: Number of SDWA rule violations occurring in each news distribution region, total and median.
Data Dictionary:
Sheet	Column	Description
NewsDistribution	np_name	Name of local newspaper
NewsDistribution	City_Published	City of publication for local newspaper
NewsDistribution	State_Published	State of publication for local newspaper
NewsDistribution	County_Name	County of distribution for local newspaper
NewsDistribution	State_of_County	State of distribution for local newspaper
NewsDistribution	Households	Total number of households in county; #N/A denotes entries with no data available.
NewsDistribution	Total_Circulation_Sun	Total Sunday circulation to households in county; #N/A denotes entries with no data available.
NewsDistribution	Percent_Household_Coverage_Sun	Percentage of county households distributed to on Sunday; #N/A denotes entries with no data available.
NewsCounts	np_name	Name of local newspaper
NewsCounts	pub_year	Year of news publication
NewsCounts	dbp_news	Total number of disinfection byproduct (DBP) articles published in local newspaper; #N/A denotes entries with no data available.
NewsCounts	voc_news	Total number of voltaile organic compounds (VOC) articles published in local newspaper; #N/A denotes entries with no data available.
NewsCounts	coli_news	Total number of total coliform rule (TCR) articles published in local newspaper; #N/A denotes entries with no data available.
NewsCounts	lcr_news	Total number of lead and copper rule (LCR) articles published in local newspaper; #N/A denotes entries with no data available.
NewsCounts	radio_news	Total number of radionuclides (RN) articles published in local newspaper; #N/A denotes entries with no data available.
DistributionDemographics	np_name	Name of local newspaper
DistributionDemographics	Year	Year of Demographics
DistributionDemographics	med_white	Percentage of non-Hispanic white population in newspaper distribution region; values represent median among associated counties
DistributionDemographics	med_black	Percentage of Black population in newspaper distribution region; values represent median among associated counties
DistributionDemographics	med_hisp	Percentage of Hispanic population in newspaper distribution region; values represent median among associated counties
DistributionDemographics	med_native	Percentage of American Indian population in newspaper distribution region; values represent median among associated counties
DistributionDemographics	med_spanish	Percentage of foreign-born spanish-speaking population in newspaper distribution region; values represent median among associated counties
DistributionDemographics	med_industry	Percentage of population employed agricultural, mining, fishing, or logging in newspaper distribution region; values represent median among associated counties
DistributionDemographics	med_repub	Percentage of Republican votes in newspaper distribution region; values represent median among associated counties
DistributionViolations	np_name	Name of local newspaper
DistributionViolations	viol_year	Year of SDWA rule violation
DistributionViolations	med_dbp	Median DBP violations in newspaper distribution region; NA denotes entries with no data available
DistributionViolations	total_dbp	Total DBP violations in newspaper distribution region; NA denotes entries with no data available
DistributionViolations	med_lcr	Median LCR violations in newspaper distribution region; NA denotes entries with no data available
DistributionViolations	total_lcr	Total DBP violations in newspaper distribution region; NA denotes entries with no data available
DistributionViolations	med_coli	Median TCR violations in newspaper distribution region; NA denotes entries with no data available
DistributionViolations	total_coli	Total TCR violations in newspaper distribution region; NA denotes entries with no data available
DistributionViolations	med_radio	Median RN violations in newspaper distribution region; NA denotes entries with no data available
DistributionViolations	total_radio	Total RN violations in newspaper distribution region; NA denotes entries with no data available
DistributionViolations	med_voc	Median VOC violations in newspaper distribution region; NA denotes entries with no data available
DistributionViolations	total_voc	Total VOC violations in newspaper distribution region; NA denotes entries with no data available

## Sheet: NewsDistribution
np_name	City_Published	State_Published	County_Name	State_of_County	Households	Total_Circulation_Sun	Percent_Household_Coverage_Sun
augusta chronicle	AUGUSTA	GA	WASHINGTON	GEORGIA	7392	134	1.68
augusta chronicle	AUGUSTA	GA	MCCORMICK	SOUTH CAROLINA	3864	195	4.66
augusta chronicle	AUGUSTA	GA	COLUMBIA	GEORGIA	58040	5178	8.23
augusta chronicle	AUGUSTA	GA	RICHMOND	GEORGIA	78612	7771	9.12
augusta chronicle	AUGUSTA	GA	WILKES	GEORGIA	4084	294	6.64
augusta chronicle	AUGUSTA	GA	MCDUFFIE	GEORGIA	8194	294	3.31
augusta chronicle	AUGUSTA	GA	AIKEN	SOUTH CAROLINA	69548	2677	3.55
augusta chronicle	AUGUSTA	GA	JENKINS	GEORGIA	2939	110	3.44
augusta chronicle	AUGUSTA	GA	EMANUEL	GEORGIA	8385	166	1.82
augusta chronicle	AUGUSTA	GA	JEFFERSON	GEORGIA	5686	378	6.14
augusta chronicle	AUGUSTA	GA	BURKE	GEORGIA	8317	336	3.73
augusta chronicle	AUGUSTA	GA	EDGEFIELD	SOUTH CAROLINA	9569	885	8.53
augusta chronicle	AUGUSTA	GA	ALLENDALE	SOUTH CAROLINA	3181	84	2.42
augusta chronicle	AUGUSTA	GA	LINCOLN	GEORGIA	3320	22	0.6
augusta chronicle	AUGUSTA	GA	WARREN	GEORGIA	2102	220	9.66
the austin american-statesman	AUSTIN	TX	TRAVIS	TEXAS	501052	38803	7.03
the austin american-statesman	AUSTIN	TX	WILLIAMSON	TEXAS	208098	16813	7.33
the austin american-statesman	AUSTIN	TX	COMAL	TEXAS	56994	250	0.4
the austin american-statesman	AUSTIN	TX	LEE	TEXAS	6538	286	3.96
the austin american-statesman	AUSTIN	TX	LAMPASAS	TEXAS	8297	251	2.75
the austin american-statesman	AUSTIN	TX	GONZALES	TEXAS	7458	90	1.1
the austin american-statesman	AUSTIN	TX	KERR	TEXAS	21865	117	0.48
the austin american-statesman	AUSTIN	TX	GUADALUPE	TEXAS	57859	84	0.13
the austin american-statesman	AUSTIN	TX	LLANO	TEXAS	10035	731	6.61
the austin american-statesman	AUSTIN	TX	FAYETTE	TEXAS	10739	334	2.82
the austin american-statesman	AUSTIN	TX	CORYELL	TEXAS	22904	220	0.87
the austin american-statesman	AUSTIN	TX	MILAM	TEXAS	9461	351	3.36
the austin american-statesman	AUSTIN	TX	BLANCO	TEXAS	4990	122	2.22
the austin american-statesman	AUSTIN	TX	BURNET	TEXAS	18461	1150	5.65
the austin american-statesman	AUSTIN	TX	CALDWELL	TEXAS	14016	805	5.21
the austin american-statesman	AUSTIN	TX	GILLESPIE	TEXAS	11773	185	1.43
the austin american-statesman	AUSTIN	TX	HAYS	TEXAS	79448	4379	5
the austin american-statesman	AUSTIN	TX	BELL	TEXAS	130696	1914	1.33
the austin american-statesman	AUSTIN	TX	BASTROP	TEXAS	30729	2647	7.81
bangor daily news	BANGOR	ME	KENNEBEC	MAINE	51896	#N/A	#N/A
bangor daily news	BANGOR	ME	ANDROSCOGGIN	MAINE	44466	#N/A	#N/A
bangor daily news	BANGOR	ME	LINCOLN	MAINE	15424	#N/A	#N/A
bangor daily news	BANGOR	ME	WALDO	MAINE	17365	#N/A	#N/A
bangor daily news	BANGOR	ME	PISCATAQUIS	MAINE	7577	#N/A	#N/A
bangor daily news	BANGOR	ME	CUMBERLAND	MAINE	124872	#N/A	#N/A
bangor daily news	BANGOR	ME	PENOBSCOT	MAINE	62675	#N/A	#N/A
bangor daily news	BANGOR	ME	SOMERSET	MAINE	21603	#N/A	#N/A
bangor daily news	BANGOR	ME	HANCOCK	MAINE	24959	#N/A	#N/A
bangor daily news	BANGOR	ME	WASHINGTON	MAINE	13991	#N/A	#N/A
bangor daily news	BANGOR	ME	AROOSTOOK	MAINE	29332	#N/A	#N/A
bangor daily news	BANGOR	ME	KNOX	MAINE	17708	#N/A	#N/A
daily news	NEW YORK	NY	RUTLAND	VERMONT	25198	74	0.22
daily news	NEW YORK	NY	ESSEX	MASSACHUSETTS	305872	76	0.02
daily news	NEW YORK	NY	WESTCHESTER	NEW YORK	362568	9641	1.97
daily news	NEW YORK	NY	SUFFOLK	MASSACHUSETTS	332946	25	0.01
daily news	NEW YORK	NY	WASHINGTON	RHODE ISLAND	49373	44	0.07
daily news	NEW YORK	NY	PROVIDENCE	RHODE ISLAND	247697	57	0.02
daily news	NEW YORK	NY	MIDDLESEX	NEW JERSEY	291773	3943	1
daily news	NEW YORK	NY	PASSAIC	NEW JERSEY	170777	1262	0.55
daily news	NEW YORK	NY	PUTNAM	NEW YORK	35530	1154	2.41
daily news	NEW YORK	NY	GREENE	NEW YORK	19470	247	0.94
daily news	NEW YORK	NY	SCHOHARIE	NEW YORK	12859	38	0.22
daily news	NEW YORK	NY	OTSEGO	NEW YORK	23985	112	0.35
daily news	NEW YORK	NY	SCHENECTADY	NEW YORK	63102	213	0.25
daily news	NEW YORK	NY	TOMPKINS	NEW YORK	41152	101	0.18
daily news	NEW YORK	NY	TIOGA	NEW YORK	19520	29	0.11
daily news	NEW YORK	NY	MONROE	NEW YORK	308014	140	0.03
daily news	NEW YORK	NY	LEHIGH	PENNSYLVANIA	140092	88	0.05
daily news	NEW YORK	NY	BERKS	PENNSYLVANIA	156441	26	0.01
daily news	NEW YORK	NY	PALM BEACH	FLORIDA	610167	500	0.06
daily news	NEW YORK	NY	ST. LUCIE	FLORIDA	123138	63	0.04
daily news	NEW YORK	NY	FAIRFIELD	CONNECTICUT	348239	2233	0.48
daily news	NEW YORK	NY	ATLANTIC	NEW JERSEY	99824	252	0.19
daily news	NEW YORK	NY	BRONX	NEW YORK	520799	15305	2.18
daily news	NEW YORK	NY	FRANKLIN	NEW YORK	19053	58	0.23
daily news	NEW YORK	NY	CORTLAND	NEW YORK	17968	36	0.15
daily news	NEW YORK	NY	HERKIMER	NEW YORK	25581	70	0.2
daily news	NEW YORK	NY	MONROE	PENNSYLVANIA	60369	359	0.44
daily news	NEW YORK	NY	SUSSEX	DELAWARE	93734	90	0.07
daily news	NEW YORK	NY	DELAWARE	NEW YORK	18723	107	0.42
daily news	NEW YORK	NY	HARTFORD	CONNECTICUT	352563	36	0.01
daily news	NEW YORK	NY	NEW LONDON	CONNECTICUT	105948	78	0.05
daily news	NEW YORK	NY	MIDDLESEX	CONNECTICUT	66884	26	0.03
daily news	NEW YORK	NY	SUSSEX	NEW JERSEY	52375	377	0.53
daily news	NEW YORK	NY	RENSSELAER	NEW YORK	66031	226	0.25
daily news	NEW YORK	NY	ONEIDA	NEW YORK	92663	398	0.32
daily news	NEW YORK	NY	STEUBEN	NEW YORK	39503	29	0.05
daily news	NEW YORK	NY	BRADFORD	PENNSYLVANIA	24803	51	0.15
daily news	NEW YORK	NY	PIKE	PENNSYLVANIA	21448	115	0.4
daily news	NEW YORK	NY	QUEENS	NEW YORK	830053	23015	2.05
daily news	NEW YORK	NY	COLLIER	FLORIDA	159030	65	0.03
daily news	NEW YORK	NY	MORRIS	NEW JERSEY	185348	1123	0.45
daily news	NEW YORK	NY	UNION	NEW JERSEY	197645	2246	0.84
daily news	NEW YORK	NY	OCEAN	NEW JERSEY	228399	2544	0.83
daily news	NEW YORK	NY	NASSAU	NEW YORK	460579	11594	1.87
daily news	NEW YORK	NY	KINGS	NEW YORK	989055	20011	1.5
daily news	NEW YORK	NY	OSWEGO	NEW YORK	45386	47	0.08
daily news	NEW YORK	NY	LUZERNE	PENNSYLVANIA	130137	189	0.11
daily news	NEW YORK	NY	BALTIMORE CITY	MARYLAND	245803	77	0.02
daily news	NEW YORK	NY	WICOMICO	MARYLAND	38891	32	0.06
daily news	NEW YORK	NY	BROWARD	FLORIDA	760312	275	0.03
daily news	NEW YORK	NY	MONROE	FLORIDA	35500	#N/A	#N/A
daily news	NEW YORK	NY	HUDSON	NEW JERSEY	276964	4231	1.13
daily news	NEW YORK	NY	BERKSHIRE	MASSACHUSETTS	54531	163	0.22
daily news	NEW YORK	NY	BURLINGTON	NEW JERSEY	167757	318	0.14
daily news	NEW YORK	NY	NEW CASTLE	DELAWARE	211434	48	0.02
daily news	NEW YORK	NY	NORFOLK	MASSACHUSETTS	272226	25	0.01
daily news	NEW YORK	NY	ROCKINGHAM	NEW HAMPSHIRE	122595	54	0.03
daily news	NEW YORK	NY	NEW HAVEN	CONNECTICUT	333694	896	0.2
daily news	NEW YORK	NY	FULTON	NEW YORK	22022	61	0.2
daily news	NEW YORK	NY	ULSTER	NEW YORK	70689	875	0.92
daily news	NEW YORK	NY	WARREN	NEW JERSEY	40999	282	0.51
daily news	NEW YORK	NY	RICHMOND	NEW YORK	170418	5161	2.24
daily news	NEW YORK	NY	ROCKLAND	NEW YORK	104781	2159	1.53
daily news	NEW YORK	NY	ORANGE	NEW YORK	130217	1759	1
daily news	NEW YORK	NY	SUFFOLK	NEW YORK	502770	8618	1.27
daily news	NEW YORK	NY	COLUMBIA	NEW YORK	25181	177	0.52
daily news	NEW YORK	NY	BUCKS	PENNSYLVANIA	239948	65	0.02
daily news	NEW YORK	NY	KENT	DELAWARE	66504	21	0.02
daily news	NEW YORK	NY	MONMOUTH	NEW JERSEY	234480	3068	0.97
daily news	NEW YORK	NY	CUMBERLAND	NEW JERSEY	49882	21	0.03
daily news	NEW YORK	NY	SARATOGA	NEW YORK	95341	343	0.27
daily news	NEW YORK	NY	SULLIVAN	NEW YORK	29585	131	0.33
daily news	NEW YORK	NY	ONONDAGA	NEW YORK	189106	319	0.12
daily news	NEW YORK	NY	MONTOUR	PENNSYLVANIA	7531	70	0.69
daily news	NEW YORK	NY	NORTHAMPTON	PENNSYLVANIA	116130	199	0.13
daily news	NEW YORK	NY	LEE	FLORIDA	315505	62	0.01
daily news	NEW YORK	NY	WORCESTER	MASSACHUSETTS	316326	37	0.01
daily news	NEW YORK	NY	BENNINGTON	VERMONT	15002	50	0.25
daily news	NEW YORK	NY	CHITTENDEN	VERMONT	66238	84	0.09
daily news	NEW YORK	NY	BERGEN	NEW JERSEY	353013	4506	0.95
daily news	NEW YORK	NY	HUNTERDON	NEW JERSEY	46875	222	0.35
daily news	NEW YORK	NY	CAMDEN	NEW JERSEY	191127	93	0.04
daily news	NEW YORK	NY	CAPE MAY	NEW JERSEY	39365	86	0.16
daily news	NEW YORK	NY	MERCER	NEW JERSEY	136504	470	0.25
daily news	NEW YORK	NY	ALBANY	NEW YORK	130129	708	0.4
daily news	NEW YORK	NY	WARREN	NEW YORK	28055	102	0.27
daily news	NEW YORK	NY	MADISON	NEW YORK	27319	27	0.07
daily news	NEW YORK	NY	CHEMUNG	NEW YORK	34548	107	0.23
daily news	NEW YORK	NY	SCHUYLKILL	PENNSYLVANIA	57451	177	0.23
daily news	NEW YORK	NY	DISTRICT OF COLUMBIA	DISTRICT OF COLUMBIA	323410	30	0.01
daily news	NEW YORK	NY	MARTIN	FLORIDA	70833	47	0.05
daily news	NEW YORK	NY	LITCHFIELD	CONNECTICUT	74162	89	0.09
daily news	NEW YORK	NY	ESSEX	NEW JERSEY	297502	1287	0.32
daily news	NEW YORK	NY	SOMERSET	NEW JERSEY	121878	571	0.35
daily news	NEW YORK	NY	GLOUCESTER	NEW JERSEY	106526	19	0.01
daily news	NEW YORK	NY	NEW YORK	NEW YORK	811634	12181	1.11
daily news	NEW YORK	NY	DUTCHESS	NEW YORK	108874	1855	1.26
daily news	NEW YORK	NY	BROOME	NEW YORK	79080	356	0.33
daily news	NEW YORK	NY	LACKAWANNA	PENNSYLVANIA	85814	264	0.23
daily news	NEW YORK	NY	WAYNE	PENNSYLVANIA	20254	200	0.73
daily news	NEW YORK	NY	MONTGOMERY	PENNSYLVANIA	320727	52	0.01
daily news	NEW YORK	NY	WORCESTER	MARYLAND	22658	69	0.23
daily news	NEW YORK	NY	NEWPORT	RHODE ISLAND	35829	23	0.05
daily news	NEW YORK	NY	CAYUGA	NEW YORK	31053	84	0.2
dayton daily news	DAYTON	OH	MERCER	OHIO	15894	170	1.03
dayton daily news	DAYTON	OH	WARREN	OHIO	84196	3185	3.64
dayton daily news	DAYTON	OH	BUTLER	OHIO	141008	221	0.15
dayton daily news	DAYTON	OH	MONTGOMERY	OHIO	224263	37551	16.12
dayton daily news	DAYTON	OH	GREENE	OHIO	67077	10195	14.63
dayton daily news	DAYTON	OH	MIAMI	OHIO	42842	5127	11.52
dayton daily news	DAYTON	OH	DARKE	OHIO	20546	1278	5.99
dayton daily news	DAYTON	OH	AUGLAIZE	OHIO	18262	425	2.24
dayton daily news	DAYTON	OH	CHAMPAIGN	OHIO	14809	145	0.95
dayton daily news	DAYTON	OH	PREBLE	OHIO	16019	1005	6.04
dayton daily news	DAYTON	OH	SHELBY	OHIO	18318	791	4.16
dayton daily news	DAYTON	OH	CLARK	OHIO	53548	1116	2.01
dayton daily news - journal news	DAYTON	OH	BUTLER	OHIO	141008	13112	8.85
dayton daily news - journal news	DAYTON	OH	PREBLE	OHIO	16019	35	0.21
dayton daily news - journal news	DAYTON	OH	MONTGOMERY	OHIO	224263	105	0.04
dayton daily news - journal news	DAYTON	OH	WARREN	OHIO	84196	1437	1.62
dayton daily news - springfield news-sun	DAYTON	OH	CHAMPAIGN	OHIO	14809	1236	8.22
dayton daily news - springfield news-sun	DAYTON	OH	MONTGOMERY	OHIO	224263	1	0
dayton daily news - springfield news-sun	DAYTON	OH	GREENE	OHIO	67077	150	0.22
dayton daily news - springfield news-sun	DAYTON	OH	CLARK	OHIO	53548	9289	17.08
dayton daily news - springfield news-sun	DAYTON	OH	MADISON	OHIO	15273	35	0.22
the hartford courant	HARTFORD	CT	HARTFORD	CONNECTICUT	352563	64194	17.49
the hartford courant	HARTFORD	CT	WINDHAM	CONNECTICUT	44162	2370	5.16
the hartford courant	HARTFORD	CT	LITCHFIELD	CONNECTICUT	74162	2392	3.1
the hartford courant	HARTFORD	CT	TOLLAND	CONNECTICUT	54644	9308	16.37
the hartford courant	HARTFORD	CT	MIDDLESEX	CONNECTICUT	66884	10684	15.35
the hartford courant	HARTFORD	CT	NEW LONDON	CONNECTICUT	105948	3921	3.56
the hartford courant	HARTFORD	CT	HAMPDEN	MASSACHUSETTS	183591	496	0.26
the hartford courant	HARTFORD	CT	NEW HAVEN	CONNECTICUT	333694	4670	1.34
lincoln journal star	LINCOLN	NE	LANCASTER	NEBRASKA	127496	21354	16.21
lincoln journal star	LINCOLN	NE	POLK	NEBRASKA	2226	28	1.21
lincoln journal star	LINCOLN	NE	FILLMORE	NEBRASKA	2402	85	3.41
lincoln journal star	LINCOLN	NE	NEMAHA	NEBRASKA	2826	76	2.62
lincoln journal star	LINCOLN	NE	GAGE	NEBRASKA	9206	804	8.45
lincoln journal star	LINCOLN	NE	OTOE	NEBRASKA	6648	346	5.04
lincoln journal star	LINCOLN	NE	JOHNSON	NEBRASKA	1802	193	10.38
lincoln journal star	LINCOLN	NE	ADAMS	NEBRASKA	12804	107	0.81
lincoln journal star	LINCOLN	NE	YORK	NEBRASKA	5715	385	6.53
lincoln journal star	LINCOLN	NE	BUTLER	NEBRASKA	3310	97	2.84
lincoln journal star	LINCOLN	NE	SEWARD	NEBRASKA	6521	750	11.13
lincoln journal star	LINCOLN	NE	BUFFALO	NEBRASKA	20112	45	0.22
lincoln journal star	LINCOLN	NE	JEFFERSON	NEBRASKA	3226	217	6.51
lincoln journal star	LINCOLN	NE	SALINE	NEBRASKA	5169	637	11.92
lincoln journal star	LINCOLN	NE	THAYER	NEBRASKA	2252	29	1.24
lincoln journal star	LINCOLN	NE	SAUNDERS	NEBRASKA	8307	364	4.24
lincoln journal star	LINCOLN	NE	HALL	NEBRASKA	23334	99	0.41
lincoln journal star	LINCOLN	NE	PLATTE	NEBRASKA	13384	63	0.46
lincoln journal star	LINCOLN	NE	CASS	NEBRASKA	10192	179	1.7
lincoln journal star	LINCOLN	NE	RICHARDSON	NEBRASKA	3583	#N/A	#N/A
richmond times dispatch	RICHMOND	VA	PRINCE EDWARD	VIRGINIA	7934	571	6.64
richmond times dispatch	RICHMOND	VA	RICHMOND CITY	VIRGINIA	98857	8626	8.06
richmond times dispatch	RICHMOND	VA	JAMES CITY	VIRGINIA	31050	387	1.15
richmond times dispatch	RICHMOND	VA	PETERSBURG CITY	VIRGINIA	13647	1092	7.39
richmond times dispatch	RICHMOND	VA	GREENSVILLE	VIRGINIA	3397	405	11.01
richmond times dispatch	RICHMOND	VA	FRANKLIN CITY	VIRGINIA	3366	63	1.72
richmond times dispatch	RICHMOND	VA	SUSSEX	VIRGINIA	3698	120	3
richmond times dispatch	RICHMOND	VA	HALIFAX	VIRGINIA	14596	531	3.36
richmond times dispatch	RICHMOND	VA	LANCASTER	VIRGINIA	5136	391	7.03
richmond times dispatch	RICHMOND	VA	CHARLES CITY	VIRGINIA	2924	256	8.07
richmond times dispatch	RICHMOND	VA	MIDDLESEX	VIRGINIA	4667	293	5.79
richmond times dispatch	RICHMOND	VA	NOTTOWAY	VIRGINIA	5437	489	8.3
richmond times dispatch	RICHMOND	VA	DANVILLE CITY	VIRGINIA	18074	116	0.59
richmond times dispatch	RICHMOND	VA	FREDERICKSBURG CITY	VIRGINIA	11068	352	2.94
richmond times dispatch	RICHMOND	VA	WESTMORELAND	VIRGINIA	7579	118	1.44
richmond times dispatch	RICHMOND	VA	CUMBERLAND	VIRGINIA	3916	199	4.7
richmond times dispatch	RICHMOND	VA	POWHATAN	VIRGINIA	10391	1233	10.95
richmond times dispatch	RICHMOND	VA	VIRGINIA BEACH CITY	VIRGINIA	174136	203	0.11
richmond times dispatch	RICHMOND	VA	NEWPORT NEWS CITY	VIRGINIA	71127	17	0.02
richmond times dispatch	RICHMOND	VA	COLONIAL HEIGHTS CITY	VIRGINIA	7433	1059	13.16
richmond times dispatch	RICHMOND	VA	DARE	NORTH CAROLINA	15548	80	0.48
richmond times dispatch	RICHMOND	VA	ALBEMARLE	VIRGINIA	42816	754	1.63
richmond times dispatch	RICHMOND	VA	RICHMOND	VIRGINIA	3175	243	7.06
richmond times dispatch	RICHMOND	VA	NORTHUMBERLAND	VIRGINIA	5501	581	9.74
richmond times dispatch	RICHMOND	VA	ESSEX	VIRGINIA	4458	350	7.25
richmond times dispatch	RICHMOND	VA	CULPEPER	VIRGINIA	17910	87	0.45
richmond times dispatch	RICHMOND	VA	FLUVANNA	VIRGINIA	9852	80	0.75
richmond times dispatch	RICHMOND	VA	HOPEWELL CITY	VIRGINIA	9173	733	7.38
richmond times dispatch	RICHMOND	VA	FAUQUIER	VIRGINIA	25529	35	0.13
richmond times dispatch	RICHMOND	VA	KING WILLIAM	VIRGINIA	6396	600	8.66
richmond times dispatch	RICHMOND	VA	KING AND QUEEN	VIRGINIA	2941	118	3.71
richmond times dispatch	RICHMOND	VA	STAUNTON CITY	VIRGINIA	11158	97	0.81
richmond times dispatch	RICHMOND	VA	CHARLOTTESVILLE CITY	VIRGINIA	20151	114	0.52
richmond times dispatch	RICHMOND	VA	HANOVER	VIRGINIA	39752	6354	14.76
richmond times dispatch	RICHMOND	VA	NEW KENT	VIRGINIA	8387	1011	11.12
richmond times dispatch	RICHMOND	VA	MECKLENBURG	VIRGINIA	13225	816	5.69
richmond times dispatch	RICHMOND	VA	CHARLOTTE	VIRGINIA	4961	191	3.55
richmond times dispatch	RICHMOND	VA	LYNCHBURG CITY	VIRGINIA	30842	117	0.35
richmond times dispatch	RICHMOND	VA	PRINCE GEORGE	VIRGINIA	12562	444	3.26
richmond times dispatch	RICHMOND	VA	BRUNSWICK	VIRGINIA	6130	294	4.42
richmond times dispatch	RICHMOND	VA	CAROLINE	VIRGINIA	11268	89	0.73
richmond times dispatch	RICHMOND	VA	WAYNESBORO CITY	VIRGINIA	9512	625	6.07
richmond times dispatch	RICHMOND	VA	LOUISA	VIRGINIA	14191	652	4.24
richmond times dispatch	RICHMOND	VA	MATHEWS	VIRGINIA	3756	46	1.12
richmond times dispatch	RICHMOND	VA	DINWIDDIE	VIRGINIA	10752	303	2.6
richmond times dispatch	RICHMOND	VA	LUNENBURG	VIRGINIA	4791	238	4.59
richmond times dispatch	RICHMOND	VA	HENRICO	VIRGINIA	132198	17794	12.43
richmond times dispatch	RICHMOND	VA	AMELIA	VIRGINIA	5047	492	9
richmond times dispatch	RICHMOND	VA	BUCKINGHAM	VIRGINIA	6014	116	1.78
richmond times dispatch	RICHMOND	VA	GLOUCESTER	VIRGINIA	14755	72	0.45
richmond times dispatch	RICHMOND	VA	CHESTERFIELD	VIRGINIA	128500	16432	11.81
richmond times dispatch	RICHMOND	VA	GOOCHLAND	VIRGINIA	8670	1419	15.11
richmond times dispatch	RICHMOND	VA	SURRY	VIRGINIA	2661	25	0.86
richmond times dispatch	RICHMOND	VA	SPOTSYLVANIA	VIRGINIA	45813	25	0.05
richmond times dispatch	RICHMOND	VA	APPOMATTOX	VIRGINIA	6477	38	0.54
south bend tribune	SOUTH BEND	IN	MARSHALL	INDIANA	17233	2026	10.9
south bend tribune	SOUTH BEND	IN	PULASKI	INDIANA	4970	44	0.82
south bend tribune	SOUTH BEND	IN	ST. JOSEPH	INDIANA	105447	22293	19.59
south bend tribune	SOUTH BEND	IN	ELKHART	INDIANA	72943	2120	2.69
south bend tribune	SOUTH BEND	IN	BERRIEN	MICHIGAN	62669	2939	4.35
south bend tribune	SOUTH BEND	IN	STARKE	INDIANA	8990	254	2.61
south bend tribune	SOUTH BEND	IN	LA PORTE	INDIANA	42205	1785	3.92
south bend tribune	SOUTH BEND	IN	CASS	MICHIGAN	20374	1349	6.14
south bend tribune	SOUTH BEND	IN	KOSCIUSKO	INDIANA	30418	25	0.08
star tribune	MINNEAPOLIS	MN	DAKOTA	MINNESOTA	166335	30523	15.94
star tribune	MINNEAPOLIS	MN	TODD	MINNESOTA	9705	651	5.82
star tribune	MINNEAPOLIS	MN	JACKSON	WISCONSIN	7996	61	0.66
star tribune	MINNEAPOLIS	MN	BARRON	WISCONSIN	19314	556	2.5
star tribune	MINNEAPOLIS	MN	PEPIN	WISCONSIN	3019	30	0.86
star tribune	MINNEAPOLIS	MN	SHERBURNE	MINNESOTA	33244	5311	13.87
star tribune	MINNEAPOLIS	MN	CARVER	MINNESOTA	38534	8099	18.25
star tribune	MINNEAPOLIS	MN	LAKE	MINNESOTA	4772	287	5.22
star tribune	MINNEAPOLIS	MN	HOUSTON	MINNESOTA	7870	249	2.74
star tribune	MINNEAPOLIS	MN	BLUE EARTH	MINNESOTA	26459	1422	4.67
star tribune	MINNEAPOLIS	MN	NOBLES	MINNESOTA	8075	392	4.21
star tribune	MINNEAPOLIS	MN	MURRAY	MINNESOTA	3602	204	4.91
star tribune	MINNEAPOLIS	MN	GRANT	MINNESOTA	2615	243	8.07
star tribune	MINNEAPOLIS	MN	MORRISON	MINNESOTA	13281	862	5.64
star tribune	MINNEAPOLIS	MN	POLK	MINNESOTA	13053	238	1.59
star tribune	MINNEAPOLIS	MN	BELTRAMI	MINNESOTA	18204	956	4.56
star tribune	MINNEAPOLIS	MN	GRAND FORKS	NORTH DAKOTA	30064	410	1.18
star tribune	MINNEAPOLIS	MN	LE SUEUR	MINNESOTA	11078	728	5.71
star tribune	MINNEAPOLIS	MN	ISANTI	MINNESOTA	15032	2132	12.31
star tribune	MINNEAPOLIS	MN	CODINGTON	SOUTH DAKOTA	12116	226	1.62
star tribune	MINNEAPOLIS	MN	BAYFIELD	WISCONSIN	6847	148	1.88
star tribune	MINNEAPOLIS	MN	PINE	MINNESOTA	11390	745	5.68
star tribune	MINNEAPOLIS	MN	HENNEPIN	MINNESOTA	528991	107245	17.61
star tribune	MINNEAPOLIS	MN	SIBLEY	MINNESOTA	5983	314	4.56
star tribune	MINNEAPOLIS	MN	OLMSTED	MINNESOTA	63332	3166	4.34
star tribune	MINNEAPOLIS	MN	NICOLLET	MINNESOTA	12997	899	6.01
star tribune	MINNEAPOLIS	MN	BROWN	MINNESOTA	10688	969	7.87
star tribune	MINNEAPOLIS	MN	WADENA	MINNESOTA	5785	379	5.69
star tribune	MINNEAPOLIS	MN	MAHNOMEN	MINNESOTA	2070	112	4.69
star tribune	MINNEAPOLIS	MN	ROBERTS	SOUTH DAKOTA	3954	80	1.75
star tribune	MINNEAPOLIS	MN	RUSK	WISCONSIN	6092	29	0.41
star tribune	MINNEAPOLIS	MN	STEELE	MINNESOTA	14730	950	5.6
star tribune	MINNEAPOLIS	MN	AITKIN	MINNESOTA	7226	627	7.53
star tribune	MINNEAPOLIS	MN	JACKSON	MINNESOTA	4353	334	6.66
star tribune	MINNEAPOLIS	MN	WILKIN	MINNESOTA	2624	85	2.82
star tribune	MINNEAPOLIS	MN	CLEARWATER	MINNESOTA	3656	62	1.48
star tribune	MINNEAPOLIS	MN	MINNEHAHA	SOUTH DAKOTA	77065	651	0.73
star tribune	MINNEAPOLIS	MN	BROOKINGS	SOUTH DAKOTA	13244	181	1.19
star tribune	MINNEAPOLIS	MN	LINCOLN	SOUTH DAKOTA	22263	73	0.28
star tribune	MINNEAPOLIS	MN	RICHLAND	NORTH DAKOTA	6782	107	1.37
star tribune	MINNEAPOLIS	MN	PIMA	ARIZONA	410927	1	0
star tribune	MINNEAPOLIS	MN	ST. CROIX	WISCONSIN	34148	1840	4.68
star tribune	MINNEAPOLIS	MN	LEE	FLORIDA	315505	3	0
star tribune	MINNEAPOLIS	MN	PENNINGTON	MINNESOTA	6078	440	6.28
star tribune	MINNEAPOLIS	MN	ASHLAND	WISCONSIN	6542	112	1.48
star tribune	MINNEAPOLIS	MN	CHISAGO	MINNESOTA	20544	2747	11.61
star tribune	MINNEAPOLIS	MN	RAMSEY	MINNESOTA	224374	22363	8.66
star tribune	MINNEAPOLIS	MN	ST. LOUIS	MINNESOTA	86521	4046	4.06
star tribune	MINNEAPOLIS	MN	DODGE	MINNESOTA	7863	245	2.71
star tribune	MINNEAPOLIS	MN	COTTONWOOD	MINNESOTA	4724	265	4.87
star tribune	MINNEAPOLIS	MN	LINCOLN	MINNESOTA	2531	172	5.89
star tribune	MINNEAPOLIS	MN	ROSEAU	MINNESOTA	6324	167	2.29
star tribune	MINNEAPOLIS	MN	DAY	SOUTH DAKOTA	2467	23	0.81
star tribune	MINNEAPOLIS	MN	BECKER	MINNESOTA	14270	514	3.13
star tribune	MINNEAPOLIS	MN	RENVILLE	MINNESOTA	6159	569	8.02
star tribune	MINNEAPOLIS	MN	DUNN	WISCONSIN	17261	103	0.52
star tribune	MINNEAPOLIS	MN	GOODHUE	MINNESOTA	19323	1235	5.55
star tribune	MINNEAPOLIS	MN	LYON	MINNESOTA	10383	627	5.24
star tribune	MINNEAPOLIS	MN	BENTON	MINNESOTA	16212	466	2.5
star tribune	MINNEAPOLIS	MN	DAVISON	SOUTH DAKOTA	8560	45	0.46
star tribune	MINNEAPOLIS	MN	EAU CLAIRE	WISCONSIN	42766	664	1.35
star tribune	MINNEAPOLIS	MN	COOK	MINNESOTA	2682	285	9.21
star tribune	MINNEAPOLIS	MN	CARLTON	MINNESOTA	13783	567	3.57
star tribune	MINNEAPOLIS	MN	WINONA	MINNESOTA	19752	689	3.03
star tribune	MINNEAPOLIS	MN	MARTIN	MINNESOTA	8699	971	9.69
star tribune	MINNEAPOLIS	MN	ROCK	MINNESOTA	3897	121	2.69
star tribune	MINNEAPOLIS	MN	SWIFT	MINNESOTA	4128	311	6.54
star tribune	MINNEAPOLIS	MN	OTTER TAIL	MINNESOTA	25176	1446	4.99
star tribune	MINNEAPOLIS	MN	HUBBARD	MINNESOTA	9155	666	6.31
star tribune	MINNEAPOLIS	MN	CASS	MINNESOTA	12602	970	6.68
star tribune	MINNEAPOLIS	MN	RED LAKE	MINNESOTA	1732	41	2.08
star tribune	MINNEAPOLIS	MN	CASS	NORTH DAKOTA	79208	762	0.84
star tribune	MINNEAPOLIS	MN	LA CROSSE	WISCONSIN	48546	386	0.69
star tribune	MINNEAPOLIS	MN	WASHBURN	WISCONSIN	7030	318	3.93
star tribune	MINNEAPOLIS	MN	SAWYER	WISCONSIN	7144	225	2.73
star tribune	MINNEAPOLIS	MN	MEEKER	MINNESOTA	9274	730	6.84
star tribune	MINNEAPOLIS	MN	CHIPPEWA	MINNESOTA	5110	249	4.23
star tribune	MINNEAPOLIS	MN	CROW WING	MINNESOTA	27479	2830	8.95
star tribune	MINNEAPOLIS	MN	RICE	MINNESOTA	23693	3690	13.52
star tribune	MINNEAPOLIS	MN	GRANT	SOUTH DAKOTA	3004	90	2.6
star tribune	MINNEAPOLIS	MN	POPE	MINNESOTA	4854	372	6.65
star tribune	MINNEAPOLIS	MN	LAC QUI PARLE	MINNESOTA	2913	201	6.01
star tribune	MINNEAPOLIS	MN	CERRO GORDO	IOWA	19239	191	0.86
star tribune	MINNEAPOLIS	MN	SCOTT	MINNESOTA	52057	9947	16.59
star tribune	MINNEAPOLIS	MN	MCLEOD	MINNESOTA	14601	2593	15.42
star tribune	MINNEAPOLIS	MN	FREEBORN	MINNESOTA	13068	1086	7.22
star tribune	MINNEAPOLIS	MN	FARIBAULT	MINNESOTA	5952	485	7.07
star tribune	MINNEAPOLIS	MN	BIG STONE	MINNESOTA	2222	265	10.35
star tribune	MINNEAPOLIS	MN	TRAVERSE	MINNESOTA	1433	135	8.16
star tribune	MINNEAPOLIS	MN	DOUGLAS	MINNESOTA	16538	1762	9.25
star tribune	MINNEAPOLIS	MN	STEARNS	MINNESOTA	61082	3304	4.7
star tribune	MINNEAPOLIS	MN	MILLE LACS	MINNESOTA	10135	1742	14.93
star tribune	MINNEAPOLIS	MN	CHIPPEWA	WISCONSIN	25542	47	0.16
star tribune	MINNEAPOLIS	MN	MOWER	MINNESOTA	15955	864	4.7
star tribune	MINNEAPOLIS	MN	KOOCHICHING	MINNESOTA	5603	144	2.23
star tribune	MINNEAPOLIS	MN	KANABEC	MINNESOTA	6430	589	7.95
star tribune	MINNEAPOLIS	MN	WASHINGTON	MINNESOTA	97984	11717	10.38
star tribune	MINNEAPOLIS	MN	WABASHA	MINNESOTA	8933	502	4.88
star tribune	MINNEAPOLIS	MN	WRIGHT	MINNESOTA	49244	9099	16.04
star tribune	MINNEAPOLIS	MN	ITASCA	MINNESOTA	19347	1232	5.53
star tribune	MINNEAPOLIS	MN	WASECA	MINNESOTA	7389	402	4.72
star tribune	MINNEAPOLIS	MN	PIPESTONE	MINNESOTA	3862	144	3.24
star tribune	MINNEAPOLIS	MN	CLAY	MINNESOTA	25116	431	1.49
star tribune	MINNEAPOLIS	MN	WINNESHIEK	IOWA	7790	130	1.45
star tribune	MINNEAPOLIS	MN	VERNON	WISCONSIN	12178	30	0.21
star tribune	MINNEAPOLIS	MN	COLLIER	FLORIDA	159030	2	0
star tribune	MINNEAPOLIS	MN	WINNEBAGO	IOWA	4589	45	0.85
star tribune	MINNEAPOLIS	MN	POLK	WISCONSIN	18057	834	4.01
star tribune	MINNEAPOLIS	MN	BURNETT	WISCONSIN	6935	174	2.18
star tribune	MINNEAPOLIS	MN	FILLMORE	MINNESOTA	8801	457	4.51
star tribune	MINNEAPOLIS	MN	REDWOOD	MINNESOTA	6275	525	7.27
star tribune	MINNEAPOLIS	MN	WATONWAN	MINNESOTA	4436	268	5.25
star tribune	MINNEAPOLIS	MN	YELLOW MEDICINE	MINNESOTA	4072	322	6.88
star tribune	MINNEAPOLIS	MN	STEVENS	MINNESOTA	3685	378	8.9
star tribune	MINNEAPOLIS	MN	KANDIYOHI	MINNESOTA	17269	1530	7.7
star tribune	MINNEAPOLIS	MN	LAKE OF THE WOODS	MINNESOTA	1680	73	3.75
star tribune	MINNEAPOLIS	MN	MARSHALL	MINNESOTA	4016	80	1.72
star tribune	MINNEAPOLIS	MN	BROWN	SOUTH DAKOTA	17095	72	0.37
star tribune	MINNEAPOLIS	MN	PIERCE	WISCONSIN	15968	607	3.3
star tribune	MINNEAPOLIS	MN	MARICOPA	ARIZONA	1634648	1	0
star tribune	MINNEAPOLIS	MN	DOUGLAS	WISCONSIN	18337	381	1.81
star tribune	MINNEAPOLIS	MN	ANOKA	MINNESOTA	132720	23755	15.54
star tribune	MINNEAPOLIS	MN	SCOTT	MINNESOTA	52057	3923	7.6
star tribune	MINNEAPOLIS	MN	DAKOTA	MINNESOTA	166335	12887	7.81
star tribune	MINNEAPOLIS	MN	MILLE LACS	MINNESOTA	10135	545	5.42
star tribune	MINNEAPOLIS	MN	RAMSEY	MINNESOTA	224374	16829	7.56
star tribune	MINNEAPOLIS	MN	WASHINGTON	MINNESOTA	97984	6643	6.83
star tribune	MINNEAPOLIS	MN	HENNEPIN	MINNESOTA	528991	32607	6.21
star tribune	MINNEAPOLIS	MN	SHERBURNE	MINNESOTA	33244	3164	9.59
star tribune	MINNEAPOLIS	MN	ANOKA	MINNESOTA	132720	13502	10.25
star tribune	MINNEAPOLIS	MN	CARVER	MINNESOTA	38534	1685	4.41
star tribune	MINNEAPOLIS	MN	ISANTI	MINNESOTA	15032	359	2.41
star tribune	MINNEAPOLIS	MN	WRIGHT	MINNESOTA	49244	2628	5.38
telegram & gazette	WORCESTER	MA	WINDHAM	CONNECTICUT	44162	333	0.7
telegram & gazette	WORCESTER	MA	WORCESTER	MASSACHUSETTS	316326	23179	6.77
telegram & gazette	WORCESTER	MA	HAMPSHIRE	MASSACHUSETTS	60431	39	0.06
telegram & gazette	WORCESTER	MA	FRANKLIN	MASSACHUSETTS	30732	48	0.14
telegram & gazette	WORCESTER	MA	CHESHIRE	NEW HAMPSHIRE	30436	36	0.11
telegram & gazette	WORCESTER	MA	HAMPDEN	MASSACHUSETTS	183591	107	0.05
telegram & gazette	WORCESTER	MA	MIDDLESEX	MASSACHUSETTS	630126	289	0.04
telegram & gazette, sunday telegram - telegram & gazette direct	WORCESTER	MA	WORCESTER	MASSACHUSETTS	316326	#N/A	#N/A
telegram & gazette, sunday telegram - the gardner news	WORCESTER	MA	FRANKLIN	MASSACHUSETTS	30732	#N/A	#N/A
telegram & gazette, sunday telegram - the gardner news	WORCESTER	MA	WORCESTER	MASSACHUSETTS	316326	#N/A	#N/A
telegraph herald	DUBUQUE	IA	IOWA	WISCONSIN	9810	89	0.77
telegraph herald	DUBUQUE	IA	JONES	IOWA	8436	61	0.62
telegraph herald	DUBUQUE	IA	JO DAVIESS	ILLINOIS	9351	2260	20.77
telegraph herald	DUBUQUE	IA	CLAYTON	IOWA	7524	354	4.04
telegraph herald	DUBUQUE	IA	GRANT	WISCONSIN	19713	2353	10.26
telegraph herald	DUBUQUE	IA	CRAWFORD	WISCONSIN	6741	127	1.62
telegraph herald	DUBUQUE	IA	LAFAYETTE	WISCONSIN	6641	342	4.43
telegraph herald	DUBUQUE	IA	DELAWARE	IOWA	6896	232	2.89
telegraph herald	DUBUQUE	IA	DUBUQUE	IOWA	39155	14080	30.91
telegraph herald	DUBUQUE	IA	JACKSON	IOWA	8235	1114	11.62
the atlanta journal-constitution	ATLANTA	GA	COWETA	GEORGIA	53114	2852	4.89
the atlanta journal-constitution	ATLANTA	GA	FORSYTH	GEORGIA	79964	4622	5.26
the atlanta journal-constitution	ATLANTA	GA	CLAYTON	GEORGIA	102446	2813	2.5
the atlanta journal-constitution	ATLANTA	GA	JASPER	GEORGIA	5091	93	1.67
the atlanta journal-constitution	ATLANTA	GA	BARTOW	GEORGIA	38089	1418	3.39
the atlanta journal-constitution	ATLANTA	GA	DEKALB	GEORGIA	308098	23123	6.84
the atlanta journal-constitution	ATLANTA	GA	BARROW	GEORGIA	27749	251	0.83
the atlanta journal-constitution	ATLANTA	GA	PAULDING	GEORGIA	55012	1816	3.01
the atlanta journal-constitution	ATLANTA	GA	HABERSHAM	GEORGIA	15947	150	0.86
the atlanta journal-constitution	ATLANTA	GA	RABUN	GEORGIA	6980	153	1.99
the atlanta journal-constitution	ATLANTA	GA	BIBB	GEORGIA	59064	175	0.27
the atlanta journal-constitution	ATLANTA	GA	NEWTON	GEORGIA	37392	1961	4.78
the atlanta journal-constitution	ATLANTA	GA	WALTON	GEORGIA	33195	2366	6.49
the atlanta journal-constitution	ATLANTA	GA	FULTON	GEORGIA	444916	31094	6.37
the atlanta journal-constitution	ATLANTA	GA	COBB	GEORGIA	292552	20438	6.36
the atlanta journal-constitution	ATLANTA	GA	CHEROKEE	GEORGIA	91468	7356	7.32
the atlanta journal-constitution	ATLANTA	GA	GILMER	GEORGIA	12870	99	0.7
the atlanta journal-constitution	ATLANTA	GA	STEPHENS	GEORGIA	10144	127	1.14
the atlanta journal-constitution	ATLANTA	GA	GORDON	GEORGIA	20244	106	0.48
the atlanta journal-constitution	ATLANTA	GA	POLK	GEORGIA	15157	406	2.44
the atlanta journal-constitution	ATLANTA	GA	CARROLL	GEORGIA	41741	1617	3.53
the atlanta journal-constitution	ATLANTA	GA	FAYETTE	GEORGIA	41651	4900	10.72
the atlanta journal-constitution	ATLANTA	GA	CLARKE	GEORGIA	50116	478	0.87
the atlanta journal-constitution	ATLANTA	GA	OCONEE	GEORGIA	14141	201	1.29
the atlanta journal-constitution	ATLANTA	GA	HALL	GEORGIA	68768	2065	2.74
the atlanta journal-constitution	ATLANTA	GA	PICKENS	GEORGIA	12350	318	2.35
the atlanta journal-constitution	ATLANTA	GA	HENRY	GEORGIA	79417	5514	6.32
the atlanta journal-constitution	ATLANTA	GA	UPSON	GEORGIA	10401	25	0.22
the atlanta journal-constitution	ATLANTA	GA	GWINNETT	GEORGIA	309822	19742	5.8
the atlanta journal-constitution	ATLANTA	GA	JACKSON	GEORGIA	24312	1129	4.23
the atlanta journal-constitution	ATLANTA	GA	SPALDING	GEORGIA	24355	412	1.54
the atlanta journal-constitution	ATLANTA	GA	ROCKDALE	GEORGIA	32724	1950	5.43
the atlanta journal-constitution	ATLANTA	GA	FLOYD	GEORGIA	36347	754	1.89
the atlanta journal-constitution	ATLANTA	GA	HARALSON	GEORGIA	10915	177	1.48
the atlanta journal-constitution	ATLANTA	GA	DOUGLAS	GEORGIA	51450	2374	4.2
the atlanta journal-constitution	ATLANTA	GA	DAWSON	GEORGIA	9563	236	2.25
the atlanta journal-constitution	ATLANTA	GA	MADISON	GEORGIA	10996	28	0.24
the atlanta journal-constitution	ATLANTA	GA	MUSCOGEE	GEORGIA	76393	700	0.84
the atlanta journal-constitution	ATLANTA	GA	BUTTS	GEORGIA	8020	26	0.3
the baltimore sun	BALTIMORE	MD	HARFORD	MARYLAND	94376	20320	19.65
the baltimore sun	BALTIMORE	MD	ANNE ARUNDEL	MARYLAND	216299	16463	6.95
the baltimore sun	BALTIMORE	MD	WICOMICO	MARYLAND	38891	1928	4.52
the baltimore sun	BALTIMORE	MD	SOMERSET	MARYLAND	8732	290	3.03
the baltimore sun	BALTIMORE	MD	CARROLL	MARYLAND	60986	3601	5.39
the baltimore sun	BALTIMORE	MD	QUEEN ANNE'S	MARYLAND	18890	949	4.58
the baltimore sun	BALTIMORE	MD	YORK	PENNSYLVANIA	173234	444	0.23
the baltimore sun	BALTIMORE	MD	BALTIMORE	MARYLAND	327381	56726	15.81
the baltimore sun	BALTIMORE	MD	TALBOT	MARYLAND	15791	1074	6.21
the baltimore sun	BALTIMORE	MD	KENT	MARYLAND	7806	304	3.55
the baltimore sun	BALTIMORE	MD	CECIL	MARYLAND	37728	867	2.1
the baltimore sun	BALTIMORE	MD	DAUPHIN	PENNSYLVANIA	114967	345	0.27
the baltimore sun	BALTIMORE	MD	DORCHESTER	MARYLAND	13227	478	3.3
the baltimore sun	BALTIMORE	MD	FREDERICK	MARYLAND	93587	440	0.43
the baltimore sun	BALTIMORE	MD	HOWARD	MARYLAND	119765	12293	9.37
the baltimore sun	BALTIMORE	MD	BALTIMORE CITY	MARYLAND	245803	29522	10.96
the baltimore sun	BALTIMORE	MD	DISTRICT OF COLUMBIA	DISTRICT OF COLUMBIA	323410	186	0.05
the baltimore sun	BALTIMORE	MD	CAROLINE	MARYLAND	12185	193	1.44
the baltimore sun	BALTIMORE	MD	WORCESTER	MARYLAND	22658	2119	8.54
the baltimore sun	BALTIMORE	MD	SAINT MARY'S	MARYLAND	40945	60	0.13
the baltimore sun	BALTIMORE	MD	ADAMS	PENNSYLVANIA	38950	36	0.08
the baltimore sun	BALTIMORE	MD	PRINCE GEORGE'S	MARYLAND	321233	269	0.08
the baltimore sun	BALTIMORE	MD	ALLEGANY	MARYLAND	27811	244	0.8
the baltimore sun	BALTIMORE	MD	WASHINGTON	MARYLAND	56909	748	1.2
the bismarck tribune	BISMARCK	ND	MCLEAN	NORTH DAKOTA	4357	392	8.12
the bismarck tribune	BISMARCK	ND	STARK	NORTH DAKOTA	12960	205	1.43
the bismarck tribune	BISMARCK	ND	OLIVER	NORTH DAKOTA	823	71	7.78
the bismarck tribune	BISMARCK	ND	GRANT	NORTH DAKOTA	1143	69	5.42
the bismarck tribune	BISMARCK	ND	MCINTOSH	NORTH DAKOTA	1214	51	3.79
the bismarck tribune	BISMARCK	ND	ADAMS	NORTH DAKOTA	1096	39	3.19
the bismarck tribune	BISMARCK	ND	KIDDER	NORTH DAKOTA	1094	68	5.58
the bismarck tribune	BISMARCK	ND	SHERIDAN	NORTH DAKOTA	680	40	5.29
the bismarck tribune	BISMARCK	ND	SIOUX	NORTH DAKOTA	1231	80	5.85
the bismarck tribune	BISMARCK	ND	LOGAN	NORTH DAKOTA	815	53	5.89
the bismarck tribune	BISMARCK	ND	MORTON	NORTH DAKOTA	13136	2167	14.9
the bismarck tribune	BISMARCK	ND	BURLEIGH	NORTH DAKOTA	41205	7994	17.52
the bismarck tribune	BISMARCK	ND	BOWMAN	NORTH DAKOTA	1414	32	2.05
the bismarck tribune	BISMARCK	ND	EMMONS	NORTH DAKOTA	1484	126	7.68
the bismarck tribune	BISMARCK	ND	MERCER	NORTH DAKOTA	3671	415	10.22
the bismarck tribune	BISMARCK	ND	HETTINGER	NORTH DAKOTA	1055	25	2.18
the columbian	VANCOUVER	WA	CLARK	WASHINGTON	182091	19873	9.87
the columbian	VANCOUVER	WA	MULTNOMAH	OREGON	342103	215	0.06
the columbian	VANCOUVER	WA	SKAMANIA	WASHINGTON	5032	152	2.72
the columbian	VANCOUVER	WA	COWLITZ	WASHINGTON	43200	454	0.95
the columbian - clark county news	VANCOUVER	WA	CLARK	WASHINGTON	182091	#N/A	#N/A
the denver post	DENVER	CO	MONTROSE	COLORADO	17013	298	1.69
the denver post	DENVER	CO	MESA	COLORADO	60255	749	1.2
the denver post	DENVER	CO	PUEBLO	COLORADO	67566	723	1.03
the denver post	DENVER	CO	JEFFERSON	COLORADO	243230	40516	16.07
the denver post	DENVER	CO	ARAPAHOE	COLORADO	258126	31393	11.74
the denver post	DENVER	CO	BROOMFIELD	COLORADO	27689	3783	13.18
the denver post	DENVER	CO	ELBERT	COLORADO	9709	405	4.03
the denver post	DENVER	CO	LARIMER	COLORADO	145044	5688	3.78
the denver post	DENVER	CO	MORGAN	COLORADO	10520	518	4.75
the denver post	DENVER	CO	PHILLIPS	COLORADO	1768	71	3.9
the denver post	DENVER	CO	ARCHULETA	COLORADO	6071	115	1.83
the denver post	DENVER	CO	GARFIELD	COLORADO	21292	699	3.17
the denver post	DENVER	CO	EAGLE	COLORADO	20423	562	2.65
the denver post	DENVER	CO	MOFFAT	COLORADO	5265	172	3.15
the denver post	DENVER	CO	LARAMIE	WYOMING	41164	527	1.24
the denver post	DENVER	CO	ALBANY	WYOMING	17161	209	1.18
the denver post	DENVER	CO	EL PASO	COLORADO	275924	3534	1.24
the denver post	DENVER	CO	DENVER	COLORADO	323013	33375	9.97
the denver post	DENVER	CO	WELD	COLORADO	112740	5214	4.46
the denver post	DENVER	CO	WASHINGTON	COLORADO	2099	44	2
the denver post	DENVER	CO	YUMA	COLORADO	4029	119	2.85
the denver post	DENVER	CO	LINCOLN	COLORADO	2082	62	2.88
the denver post	DENVER	CO	KIT CARSON	COLORADO	3015	60	1.92
the denver post	DENVER	CO	TELLER	COLORADO	10719	80	0.72
the denver post	DENVER	CO	DELTA	COLORADO	12736	161	1.22
the denver post	DENVER	CO	ADAMS	COLORADO	178370	16984	9.19
the denver post	DENVER	CO	BOULDER	COLORADO	134585	10022	7.19
the denver post	DENVER	CO	SUMMIT	COLORADO	13407	577	4.15
the denver post	DENVER	CO	ROUTT	COLORADO	11008	261	2.29
the denver post	DENVER	CO	GRAND	COLORADO	6903	372	5.2
the denver post	DENVER	CO	PROWERS	COLORADO	4762	57	1.15
the denver post	DENVER	CO	CHAFFEE	COLORADO	8800	496	5.44
the denver post	DENVER	CO	DOUGLAS	COLORADO	125737	16679	12.8
the denver post	DENVER	CO	MONTEZUMA	COLORADO	11277	133	1.14
the denver post	DENVER	CO	PITKIN	COLORADO	8673	132	1.46
the denver post	DENVER	CO	GILPIN	COLORADO	2849	75	2.53
the denver post	DENVER	CO	OTERO	COLORADO	7638	62	0.79
the denver post	DENVER	CO	LA PLATA	COLORADO	23780	193	0.78
the denver post	DENVER	CO	PARK	COLORADO	8278	185	2.16
the denver post	DENVER	CO	LAKE	COLORADO	3246	92	2.74
the denver post	DENVER	CO	BENT	COLORADO	1645	31	1.82
the denver post	DENVER	CO	RIO GRANDE	COLORADO	4564	110	2.32
the denver post	DENVER	CO	CLEAR CREEK	COLORADO	4612	204	4.27
the denver post	DENVER	CO	LOGAN	COLORADO	8127	441	5.24
the denver post	DENVER	CO	ALAMOSA	COLORADO	6383	99	1.5
the denver post	DENVER	CO	GUNNISON	COLORADO	7414	222	2.89
the denver post	DENVER	CO	FREMONT	COLORADO	17583	358	1.96
the denver post/the sunday denver post - sunday select	DENVER	CO	LARIMER	COLORADO	145044	17	0.01
the denver post/the sunday denver post - sunday select	DENVER	CO	ADAMS	COLORADO	178370	18129	10.15
the denver post/the sunday denver post - sunday select	DENVER	CO	DENVER	COLORADO	323013	22693	7.01
the denver post/the sunday denver post - sunday select	DENVER	CO	WELD	COLORADO	112740	1022	0.9
the denver post/the sunday denver post - sunday select	DENVER	CO	JEFFERSON	COLORADO	243230	26307	10.8
the denver post/the sunday denver post - sunday select	DENVER	CO	BOULDER	COLORADO	134585	4693	3.48
the denver post/the sunday denver post - sunday select	DENVER	CO	DOUGLAS	COLORADO	125737	15693	12.46
the denver post/the sunday denver post - sunday select	DENVER	CO	BROOMFIELD	COLORADO	27689	3090	11.14
the denver post/the sunday denver post - sunday select	DENVER	CO	ARAPAHOE	COLORADO	258126	22534	8.72
the morning call	ALLENTOWN	PA	MONROE	PENNSYLVANIA	60369	808	1.2
the morning call	ALLENTOWN	PA	CARBON	PENNSYLVANIA	26207	5392	18.52
the morning call	ALLENTOWN	PA	SCHUYLKILL	PENNSYLVANIA	57451	1366	2.14
the morning call	ALLENTOWN	PA	BUCKS	PENNSYLVANIA	239948	2633	0.99
the morning call	ALLENTOWN	PA	WARREN	NEW JERSEY	40999	228	0.5
the morning call	ALLENTOWN	PA	MONTGOMERY	PENNSYLVANIA	320727	1343	0.38
the morning call	ALLENTOWN	PA	NORTHAMPTON	PENNSYLVANIA	116130	27235	21.11
the morning call	ALLENTOWN	PA	LEHIGH	PENNSYLVANIA	140092	44651	28.68
the morning call	ALLENTOWN	PA	BERKS	PENNSYLVANIA	156441	1410	0.81
the morning call	ALLENTOWN	PA	DAUPHIN	PENNSYLVANIA	114967	145	0.11
the morning call - hoy de semana	ALLENTOWN	PA	NORTHAMPTON	PENNSYLVANIA	116130	#N/A	#N/A
the morning call - hoy de semana	ALLENTOWN	PA	LEHIGH	PENNSYLVANIA	140092	#N/A	#N/A
the morning call	ALLENTOWN	PA	WARREN	NEW JERSEY	40999	#N/A	#N/A
the morning call	ALLENTOWN	PA	LEHIGH	PENNSYLVANIA	140092	#N/A	#N/A
the morning call	ALLENTOWN	PA	BUCKS	PENNSYLVANIA	239948	#N/A	#N/A
the morning call	ALLENTOWN	PA	CARBON	PENNSYLVANIA	26207	#N/A	#N/A
the morning call	ALLENTOWN	PA	MONTGOMERY	PENNSYLVANIA	320727	#N/A	#N/A
the morning call	ALLENTOWN	PA	BERKS	PENNSYLVANIA	156441	#N/A	#N/A
the morning call	ALLENTOWN	PA	NORTHAMPTON	PENNSYLVANIA	116130	#N/A	#N/A
the morning call	ALLENTOWN	PA	SCHUYLKILL	PENNSYLVANIA	57451	#N/A	#N/A
the morning call - morning call weekly-tmc	ALLENTOWN	PA	NORTHAMPTON	PENNSYLVANIA	116130	#N/A	#N/A
the morning call - morning call weekly-tmc	ALLENTOWN	PA	BERKS	PENNSYLVANIA	156441	#N/A	#N/A
the morning call - morning call weekly-tmc	ALLENTOWN	PA	MONTGOMERY	PENNSYLVANIA	320727	#N/A	#N/A
the morning call - morning call weekly-tmc	ALLENTOWN	PA	BUCKS	PENNSYLVANIA	239948	#N/A	#N/A
the morning call - morning call weekly-tmc	ALLENTOWN	PA	LEHIGH	PENNSYLVANIA	140092	#N/A	#N/A
providence journal	PROVIDENCE	RI	PROVIDENCE	RHODE ISLAND	247697	20731	7.92
providence journal	PROVIDENCE	RI	NORFOLK	MASSACHUSETTS	272226	57	0.02
providence journal	PROVIDENCE	RI	BRISTOL	RHODE ISLAND	19279	2692	13.21
providence journal	PROVIDENCE	RI	KENT	RHODE ISLAND	68652	8943	12.32
providence journal	PROVIDENCE	RI	WORCESTER	MASSACHUSETTS	316326	44	0.01
providence journal	PROVIDENCE	RI	NEWPORT	RHODE ISLAND	35829	2353	6.21
providence journal	PROVIDENCE	RI	BRISTOL	MASSACHUSETTS	221495	2238	0.96
providence journal	PROVIDENCE	RI	WASHINGTON	RHODE ISLAND	49373	5625	10.78
the santa fe new mexican	SANTA FE	NM	LOS ALAMOS	NEW MEXICO	8362	368	4.02
the santa fe new mexican	SANTA FE	NM	SANDOVAL	NEW MEXICO	53505	36	0.06
the santa fe new mexican	SANTA FE	NM	TAOS	NEW MEXICO	15081	242	1.47
the santa fe new mexican	SANTA FE	NM	RIO ARRIBA	NEW MEXICO	15564	660	3.87
the santa fe new mexican	SANTA FE	NM	SANTA FE	NEW MEXICO	65804	12804	17.76
the santa fe new mexican	SANTA FE	NM	SAN MIGUEL	NEW MEXICO	11371	436	3.5
chicago daily herald	ARLINGTON HEIGHTS	IL	DUPAGE	ILLINOIS	345205	10518	2.88
chicago daily herald	ARLINGTON HEIGHTS	IL	MCHENRY	ILLINOIS	111409	2531	2.15
chicago daily herald	ARLINGTON HEIGHTS	IL	LAKE	ILLINOIS	245275	10944	4.22
chicago daily herald	ARLINGTON HEIGHTS	IL	KANE	ILLINOIS	177815	9307	4.94
chicago daily herald	ARLINGTON HEIGHTS	IL	COOK	ILLINOIS	2003327	22613	1.07
chicago daily herald	ARLINGTON HEIGHTS	IL	WILL	ILLINOIS	229904	341	0.14
the mercury news	SAN JOSE	CA	SANTA CLARA	CALIFORNIA	670131	78591	10.94
the mercury news	SAN JOSE	CA	SAN FRANCISCO	CALIFORNIA	390267	733	0.18
the mercury news	SAN JOSE	CA	SAN MATEO	CALIFORNIA	279424	14176	4.73
the mercury news	SAN JOSE	CA	CONTRA COSTA	CALIFORNIA	412023	88	0.02
the mercury news	SAN JOSE	CA	MONTEREY	CALIFORNIA	134944	1149	0.79
the mercury news	SAN JOSE	CA	SANTA CRUZ	CALIFORNIA	100083	5974	5.57
the mercury news	SAN JOSE	CA	ALAMEDA	CALIFORNIA	610230	6339	0.97
the mercury news	SAN JOSE	CA	SAN BENITO	CALIFORNIA	18605	1275	6.39
marin independent journal	SAN JOSE	CA	MARIN	CALIFORNIA	107514	16002	14.33
marin independent journal	SAN JOSE	CA	SONOMA	CALIFORNIA	196770	153	0.07
the daily oklahoman	OKLAHOMA CITY	OK	GRADY	OKLAHOMA	21028	397	1.75
the daily oklahoman	OKLAHOMA CITY	OK	POTTAWATOMIE	OKLAHOMA	27113	1447	4.96
the daily oklahoman	OKLAHOMA CITY	OK	KINGFISHER	OKLAHOMA	6035	260	4.01
the daily oklahoman	OKLAHOMA CITY	OK	OKLAHOMA	OKLAHOMA	318041	32961	9.64
the daily oklahoman	OKLAHOMA CITY	OK	CANADIAN	OKLAHOMA	54052	5014	8.63
the daily oklahoman	OKLAHOMA CITY	OK	MCCLAIN	OKLAHOMA	15117	1073	6.6
the daily oklahoman	OKLAHOMA CITY	OK	PAYNE	OKLAHOMA	32231	675	1.95
the daily oklahoman	OKLAHOMA CITY	OK	CLEVELAND	OKLAHOMA	109923	9249	7.83
the daily oklahoman	OKLAHOMA CITY	OK	LOGAN	OKLAHOMA	17506	541	2.87
the daily oklahoman	OKLAHOMA CITY	OK	MURRAY	OKLAHOMA	5503	299	5.05
the daily oklahoman	OKLAHOMA CITY	OK	LINCOLN	OKLAHOMA	13796	179	1.2
the daily oklahoman	OKLAHOMA CITY	OK	CARTER	OKLAHOMA	18629	445	2.22
the daily oklahoman	OKLAHOMA CITY	OK	JEFFERSON	OKLAHOMA	2476	25	0.93
orange county register	SANTA ANA	CA	ORANGE	CALIFORNIA	1062951	126740	11.94
orange county register	SANTA ANA	CA	RIVERSIDE	CALIFORNIA	759595	2206	0.29
orange county register	SANTA ANA	CA	SAN BERNARDINO	CALIFORNIA	647673	848	0.13
orange county register	SANTA ANA	CA	LOS ANGELES	CALIFORNIA	3389819	3704	0.11
san bernardino sun	SANTA ANA	CA	SAN BERNARDINO	CALIFORNIA	647673	18313	2.48
san bernardino sun	SANTA ANA	CA	RIVERSIDE	CALIFORNIA	759595	772	0.09
the tampa tribune	ST. PETERSBURG	FL	SCOTT	TENNESSEE	8619	19	0.21
the tampa tribune	ST. PETERSBURG	FL	POLK	FLORIDA	262211	1521	0.56
the tampa tribune	ST. PETERSBURG	FL	LAKE	FLORIDA	143089	93	0.06
the tampa tribune	ST. PETERSBURG	FL	HERNANDO	FLORIDA	78136	16095	19.77
the tampa tribune	ST. PETERSBURG	FL	CITRUS	FLORIDA	66727	3480	5.01
the tampa tribune	ST. PETERSBURG	FL	PASCO	FLORIDA	215920	38325	17.04
the tampa tribune	ST. PETERSBURG	FL	PINELLAS	FLORIDA	451229	100348	21.35
the tampa tribune	ST. PETERSBURG	FL	HILLSBOROUGH	FLORIDA	555687	81018	13.99
the tampa tribune	ST. PETERSBURG	FL	SUMTER	FLORIDA	61792	284	0.44
the tampa tribune	ST. PETERSBURG	FL	LEVY	FLORIDA	16672	36	0.21
the tampa tribune	ST. PETERSBURG	FL	MANATEE	FLORIDA	165496	1567	0.91
the tampa tribune	ST. PETERSBURG	FL	MARION	FLORIDA	151206	732	0.46
the capital times	MADISON	WI	ROCK	WISCONSIN	64682	1149	1.7
the capital times	MADISON	WI	GREEN	WISCONSIN	15110	1237	7.83
the capital times	MADISON	WI	CRAWFORD	WISCONSIN	6741	194	2.74
the capital times	MADISON	WI	PORTAGE	WISCONSIN	28662	300	1
the capital times	MADISON	WI	DANE	WISCONSIN	230801	30726	12.73
the capital times	MADISON	WI	WINNEBAGO	WISCONSIN	71458	201	0.27
the capital times	MADISON	WI	WALWORTH	WISCONSIN	40704	7	0.02
the capital times	MADISON	WI	IOWA	WISCONSIN	9810	888	8.65
the capital times	MADISON	WI	MONROE	WISCONSIN	18182	138	0.73
the capital times	MADISON	WI	MARQUETTE	WISCONSIN	6716	368	5.24
the capital times	MADISON	WI	JUNEAU	WISCONSIN	10730	490	4.36
the capital times	MADISON	WI	VERNON	WISCONSIN	12178	82	0.64
the capital times	MADISON	WI	RICHLAND	WISCONSIN	7220	459	6.08
the capital times	MADISON	WI	LAFAYETTE	WISCONSIN	6641	289	4.16
the capital times	MADISON	WI	SAUK	WISCONSIN	26819	3018	10.76
the capital times	MADISON	WI	GRANT	WISCONSIN	19713	898	4.36
the capital times	MADISON	WI	COLUMBIA	WISCONSIN	23410	2319	9.47
the capital times	MADISON	WI	JEFFERSON	WISCONSIN	33401	1212	3.47
the capital times	MADISON	WI	DODGE	WISCONSIN	34073	591	1.66

## Sheet: NewsCounts
np_name	pub_year	dbp_news	voc_news	coli_news	lcr_news	radio_news
the capital times	2009	#N/A	2	#N/A	4	#N/A
the capital times	2010	#N/A	#N/A	1	2	#N/A
the capital times	2011	1	1	#N/A	#N/A	#N/A
the capital times	2012	#N/A	2	#N/A	4	2
the capital times	2013	#N/A	2	#N/A	#N/A	1
the capital times	2014	#N/A	#N/A	1	1	#N/A
the capital times	2015	#N/A	#N/A	#N/A	4	1
the capital times	2016	#N/A	#N/A	#N/A	12	#N/A
the capital times	2017	1	#N/A	#N/A	16	1
richmond times dispatch	2009	2	#N/A	#N/A	8	14
richmond times dispatch	2010	3	#N/A	#N/A	8	6
richmond times dispatch	2011	5	#N/A	#N/A	2	23
richmond times dispatch	2012	2	#N/A	#N/A	3	30
richmond times dispatch	2013	1	#N/A	1	8	20
richmond times dispatch	2014	2	2	#N/A	12	5
richmond times dispatch	2015	#N/A	2	1	11	10
richmond times dispatch	2016	3	#N/A	#N/A	16	3
richmond times dispatch	2017	3	#N/A	#N/A	28	1
deseret morning news	2009	9	2	3	22	28
deseret morning news	2010	12	3	2	73	47
deseret morning news	2011	8	8	1	45	53
deseret morning news	2013	5	5	1	26	25
deseret morning news	2014	5	2	3	16	8
deseret morning news	2015	9	#N/A	5	16	5
deseret morning news	2016	1	#N/A	#N/A	32	5
deseret morning news	2017	#N/A	1	#N/A	21	4
brattleboro reformer	2009	6	1	3	21	12
brattleboro reformer	2010	2	3	#N/A	14	20
brattleboro reformer	2011	5	1	1	13	13
brattleboro reformer	2012	6	2	4	21	4
brattleboro reformer	2013	1	1	1	8	6
brattleboro reformer	2014	3	1	2	4	6
brattleboro reformer	2015	3	3	2	7	2
brattleboro reformer	2016	1	#N/A	1	32	1
brattleboro reformer	2017	#N/A	#N/A	#N/A	1	#N/A
idaho falls post register	2009	1	#N/A	#N/A	2	9
idaho falls post register	2010	#N/A	#N/A	#N/A	2	6
idaho falls post register	2011	#N/A	#N/A	#N/A	3	6
idaho falls post register	2012	3	1	#N/A	3	2
idaho falls post register	2013	2	#N/A	1	#N/A	3
idaho falls post register	2014	#N/A	#N/A	#N/A	#N/A	#N/A
idaho falls post register	2015	1	#N/A	#N/A	8	5
idaho falls post register	2016	1	1	#N/A	3	3
idaho falls post register	2017	2	#N/A	#N/A	4	4
the tampa tribune	2009	11	4	#N/A	12	#N/A
the tampa tribune	2010	5	1	1	8	#N/A
the tampa tribune	2011	9	2	1	10	2
the tampa tribune	2012	3	1	#N/A	7	1
the tampa tribune	2013	9	1	1	12	6
the tampa tribune	2014	12	1	1	15	5
the tampa tribune	2015	6	#N/A	#N/A	12	3
the tampa tribune	2016	1	#N/A	1	24	2
the tampa tribune	2017	#N/A	#N/A	#N/A	#N/A	#N/A
telegram & gazette	2009	13	1	17	14	1
telegram & gazette	2010	6	3	5	18	#N/A
telegram & gazette	2011	16	4	2	23	6
telegram & gazette	2012	7	#N/A	9	30	#N/A
telegram & gazette	2013	9	#N/A	4	21	6
telegram & gazette	2014	6	2	1	14	3
telegram & gazette	2015	2	1	#N/A	15	4
telegram & gazette	2016	6	2	7	62	7
telegram & gazette	2017	6	#N/A	#N/A	41	4
topeka capital-journal	2009	8	#N/A	#N/A	13	5
topeka capital-journal	2010	3	2	#N/A	11	5
topeka capital-journal	2011	1	#N/A	#N/A	4	#N/A
topeka capital-journal	2012	7	2	#N/A	13	1
topeka capital-journal	2013	5	#N/A	1	12	3
topeka capital-journal	2014	11	#N/A	#N/A	8	#N/A
topeka capital-journal	2015	1	#N/A	#N/A	11	1
topeka capital-journal	2016	3	#N/A	1	16	#N/A
the baltimore sun	2009	1	5	#N/A	13	4
the baltimore sun	2010	3	8	1	26	2
the baltimore sun	2011	5	5	1	25	9
the baltimore sun	2012	5	4	1	25	7
the baltimore sun	2013	7	5	1	21	10
the baltimore sun	2014	7	2	1	18	5
the baltimore sun	2015	3	#N/A	#N/A	29	8
the baltimore sun	2016	5	#N/A	#N/A	47	2
the baltimore sun	2017	3	5	2	21	#N/A
the charleston gazette-mail	2009	21	5	11	33	11
the charleston gazette-mail	2010	26	17	3	59	6
the charleston gazette-mail	2011	19	16	5	44	13
the charleston gazette-mail	2012	24	10	2	44	13
the charleston gazette-mail	2013	21	5	4	40	17
the charleston gazette-mail	2014	27	5	13	55	11
the charleston gazette-mail	2015	13	14	5	40	13
the charleston gazette-mail	2016	10	3	6	68	5
the charleston gazette-mail	2017	11	1	3	25	3
telegraph herald	2009	5	#N/A	3	16	7
telegraph herald	2010	9	1	#N/A	18	9
telegraph herald	2011	5	2	#N/A	8	8
telegraph herald	2012	9	2	#N/A	27	2
telegraph herald	2013	9	6	2	20	5
telegraph herald	2014	12	1	2	20	4
telegraph herald	2015	11	2	1	30	11
telegraph herald	2016	13	#N/A	4	83	6
telegraph herald	2017	1	#N/A	#N/A	37	2
south bend tribune	2009	2	1	1	10	#N/A
south bend tribune	2010	6	1	1	9	#N/A
south bend tribune	2011	2	2	1	5	#N/A
south bend tribune	2012	1	1	#N/A	6	2
south bend tribune	2013	3	#N/A	#N/A	2	#N/A
south bend tribune	2014	#N/A	#N/A	#N/A	5	#N/A
south bend tribune	2015	1	#N/A	#N/A	6	#N/A
south bend tribune	2016	1	1	1	15	#N/A
south bend tribune	2017	#N/A	#N/A	#N/A	24	#N/A
arizona capitol times	2009	#N/A	#N/A	#N/A	2	5
arizona capitol times	2010	#N/A	#N/A	#N/A	#N/A	1
arizona capitol times	2011	#N/A	#N/A	#N/A	2	#N/A
arizona capitol times	2012	#N/A	#N/A	#N/A	2	#N/A
arizona capitol times	2013	#N/A	#N/A	#N/A	1	#N/A
arizona capitol times	2014	#N/A	#N/A	#N/A	1	#N/A
arizona capitol times	2015	#N/A	#N/A	#N/A	#N/A	#N/A
arizona capitol times	2016	#N/A	#N/A	#N/A	3	1
arizona capitol times	2017	#N/A	#N/A	#N/A	#N/A	1
bangor daily news	2009	5	#N/A	1	10	2
bangor daily news	2010	5	#N/A	#N/A	22	2
bangor daily news	2011	3	#N/A	#N/A	20	1
bangor daily news	2012	7	2	1	38	1
bangor daily news	2013	8	1	3	28	1
bangor daily news	2014	17	#N/A	4	39	3
bangor daily news	2015	12	#N/A	#N/A	36	#N/A
bangor daily news	2016	14	#N/A	2	73	2
bangor daily news	2017	8	5	2	32	#N/A
the morning call	2009	1	2	1	13	3
the morning call	2010	6	4	5	12	1
the morning call	2011	10	2	4	7	5
the morning call	2012	2	1	1	14	#N/A
the morning call	2013	2	#N/A	3	12	#N/A
the morning call	2014	2	#N/A	2	5	#N/A
the morning call	2015	#N/A	3	1	12	#N/A
the morning call	2016	5	1	2	40	1
the morning call	2017	7	2	1	29	3
the augusta chronicle	2009	8	2	7	14	3
the augusta chronicle	2010	11	4	15	24	9
the augusta chronicle	2011	5	1	1	24	11
the augusta chronicle	2012	8	3	2	22	9
the augusta chronicle	2013	4	#N/A	#N/A	17	11
the augusta chronicle	2014	5	4	#N/A	5	3
the augusta chronicle	2015	5	#N/A	#N/A	4	3
the augusta chronicle	2016	1	1	#N/A	24	1
the augusta chronicle	2017	#N/A	#N/A	#N/A	11	4
daily journal of commerce	2009	2	1	#N/A	6	#N/A
daily journal of commerce	2010	3	#N/A	#N/A	4	#N/A
daily journal of commerce	2011	#N/A	1	#N/A	6	1
daily journal of commerce	2012	#N/A	1	#N/A	#N/A	#N/A
daily journal of commerce	2013	#N/A	#N/A	#N/A	#N/A	1
daily journal of commerce	2014	#N/A	#N/A	#N/A	1	#N/A
daily journal of commerce	2015	#N/A	#N/A	#N/A	2	#N/A
daily journal of commerce	2016	#N/A	#N/A	#N/A	1	#N/A
daily journal of commerce	2017	#N/A	#N/A	#N/A	1	#N/A
the hartford courant	2009	12	5	4	30	1
the hartford courant	2010	1	#N/A	1	11	4
the hartford courant	2011	2	1	#N/A	9	1
the hartford courant	2012	2	#N/A	2	17	#N/A
the hartford courant	2013	1	#N/A	#N/A	12	1
the hartford courant	2014	1	#N/A	1	19	#N/A
the hartford courant	2015	#N/A	#N/A	#N/A	31	#N/A
the hartford courant	2016	4	#N/A	1	29	3
the hartford courant	2017	11	#N/A	#N/A	38	1
the denver post	2009	8	11	3	32	15
the denver post	2010	5	2	1	17	48
the denver post	2011	5	12	1	24	23
the denver post	2012	4	22	1	30	18
the denver post	2013	5	25	1	21	8
the denver post	2014	8	10	1	20	3
the denver post	2015	4	5	#N/A	35	11
the denver post	2016	3	#N/A	1	80	5
the denver post	2017	3	#N/A	#N/A	45	6
providence journal	2009	4	2	3	30	3
providence journal	2010	8	#N/A	6	22	1
providence journal	2011	6	#N/A	4	21	3
providence journal	2012	2	3	#N/A	20	1
providence journal	2013	5	#N/A	1	14	#N/A
providence journal	2014	3	1	1	20	1
providence journal	2015	2	1	3	20	2
providence journal	2016	#N/A	1	1	28	#N/A
providence journal	2017	#N/A	#N/A	2	17	1
the daily oklahoman	2009	13	#N/A	4	15	4
the daily oklahoman	2010	10	3	2	16	2
the daily oklahoman	2011	4	2	#N/A	7	#N/A
the daily oklahoman	2012	2	#N/A	#N/A	4	#N/A
the daily oklahoman	2013	6	#N/A	#N/A	9	#N/A
the daily oklahoman	2014	6	4	#N/A	10	2
the daily oklahoman	2015	20	#N/A	6	19	2
the daily oklahoman	2016	5	1	#N/A	19	2
the daily oklahoman	2017	10	7	#N/A	21	1
san bernardino sun	2009	2	2	#N/A	9	1
san bernardino sun	2010	1	4	#N/A	3	1
san bernardino sun	2011	1	#N/A	2	5	1
san bernardino sun	2012	#N/A	2	#N/A	15	#N/A
san bernardino sun	2013	#N/A	6	#N/A	13	#N/A
san bernardino sun	2014	#N/A	1	#N/A	9	2
san bernardino sun	2015	#N/A	#N/A	#N/A	10	#N/A
san bernardino sun	2016	5	3	#N/A	27	2
san bernardino sun	2017	7	#N/A	#N/A	28	#N/A
the atlanta journal-constitution	2009	5	#N/A	1	16	2
the atlanta journal-constitution	2010	9	#N/A	3	10	10
the atlanta journal-constitution	2011	5	3	1	13	#N/A
the atlanta journal-constitution	2012	5	#N/A	1	8	2
the atlanta journal-constitution	2013	6	1	#N/A	18	#N/A
the atlanta journal-constitution	2014	6	2	#N/A	17	#N/A
the atlanta journal-constitution	2015	6	#N/A	3	12	#N/A
the atlanta journal-constitution	2016	6	#N/A	1	21	#N/A
the atlanta journal-constitution	2017	1	#N/A	#N/A	19	1
dayton daily news	2009	3	1	4	7	1
dayton daily news	2010	3	#N/A	#N/A	9	#N/A
dayton daily news	2011	7	#N/A	#N/A	5	1
dayton daily news	2012	39	1	2	5	#N/A
dayton daily news	2013	98	#N/A	2	19	3
dayton daily news	2014	104	4	5	19	5
dayton daily news	2015	111	2	2	25	3
dayton daily news	2016	108	#N/A	1	233	9
dayton daily news	2017	122	6	#N/A	94	10
the austin american-statesman	2009	3	#N/A	1	12	2
the austin american-statesman	2010	4	2	#N/A	16	1
the austin american-statesman	2011	7	2	1	10	2
the austin american-statesman	2012	4	2	#N/A	14	2
the austin american-statesman	2013	9	#N/A	#N/A	7	3
the austin american-statesman	2014	7	#N/A	#N/A	14	3
the austin american-statesman	2015	#N/A	#N/A	3	11	5
the austin american-statesman	2016	9	#N/A	#N/A	24	3
the austin american-statesman	2017	6	2	#N/A	6	#N/A
the wyoming tribune-eagle	2009	#N/A	10	2	3	1
the wyoming tribune-eagle	2010	#N/A	4	2	5	4
the wyoming tribune-eagle	2011	#N/A	1	2	1	2
the wyoming tribune-eagle	2012	#N/A	#N/A	#N/A	1	2
the wyoming tribune-eagle	2013	#N/A	#N/A	#N/A	2	#N/A
the wyoming tribune-eagle	2014	3	#N/A	#N/A	37	1
the wyoming tribune-eagle	2015	3	6	#N/A	8	1
the wyoming tribune-eagle	2016	#N/A	1	#N/A	5	1
the wyoming tribune-eagle	2017	#N/A	1	#N/A	3	1
marin independent journal	2009	4	#N/A	5	12	#N/A
marin independent journal	2010	2	#N/A	3	9	6
marin independent journal	2011	1	#N/A	#N/A	7	#N/A
marin independent journal	2012	3	3	#N/A	7	2
marin independent journal	2013	2	1	1	2	1
marin independent journal	2014	#N/A	2	1	4	#N/A
marin independent journal	2015	3	#N/A	3	11	1
marin independent journal	2016	3	#N/A	2	16	1
marin independent journal	2017	3	#N/A	#N/A	14	#N/A
star tribune	2009	11	#N/A	5	36	1
star tribune	2010	8	#N/A	3	32	#N/A
star tribune	2011	4	#N/A	3	33	3
star tribune	2012	9	#N/A	#N/A	38	2
star tribune	2013	10	1	1	27	1
star tribune	2014	8	7	#N/A	45	1
star tribune	2015	11	1	#N/A	39	3
star tribune	2016	7	4	1	49	2
star tribune	2017	3	#N/A	1	35	2
the salt lake tribune	2009	4	4	4	39	39
the salt lake tribune	2010	9	9	3	29	25
the salt lake tribune	2011	11	2	3	36	20
the salt lake tribune	2012	3	1	4	19	14
the salt lake tribune	2013	5	1	#N/A	12	5
the salt lake tribune	2014	3	4	1	17	4
the salt lake tribune	2015	2	1	3	23	16
the salt lake tribune	2016	2	2	1	40	13
the salt lake tribune	2017	10	#N/A	1	38	13
the santa fe new mexican	2009	18	3	2	44	10
the santa fe new mexican	2010	13	2	5	33	13
the santa fe new mexican	2011	3	1	#N/A	8	1
the santa fe new mexican	2012	1	#N/A	#N/A	3	5
the santa fe new mexican	2013	#N/A	#N/A	#N/A	#N/A	#N/A
chicago daily herald	2009	18	5	#N/A	40	9
chicago daily herald	2010	11	3	2	49	5
chicago daily herald	2011	9	2	2	53	7
chicago daily herald	2012	13	3	2	54	3
chicago daily herald	2013	9	2	4	44	8
chicago daily herald	2014	18	#N/A	7	48	6
chicago daily herald	2015	18	3	6	31	6
chicago daily herald	2016	14	#N/A	9	141	4
chicago daily herald	2017	8	#N/A	#N/A	63	1
chapel hill herald	2009	7	1	#N/A	2	#N/A
chapel hill herald	2010	1	1	#N/A	#N/A	#N/A
chapel hill herald	2011	4	1	#N/A	3	#N/A
chapel hill herald	2012	#N/A	#N/A	#N/A	#N/A	#N/A
chapel hill herald	2013	5	#N/A	#N/A	1	#N/A
chapel hill herald	2014	#N/A	#N/A	#N/A	#N/A	#N/A
chapel hill herald	2015	1	#N/A	#N/A	#N/A	#N/A
chapel hill herald	2016	2	#N/A	#N/A	#N/A	#N/A
chapel hill herald	2017	#N/A	#N/A	#N/A	#N/A	#N/A
the columbian	2009	1	#N/A	#N/A	2	#N/A
the columbian	2010	#N/A	#N/A	#N/A	#N/A	#N/A
the columbian	2011	#N/A	#N/A	#N/A	1	#N/A
the columbian	2012	#N/A	#N/A	#N/A	#N/A	#N/A
the columbian	2013	#N/A	#N/A	#N/A	#N/A	#N/A
the columbian	2014	#N/A	#N/A	#N/A	#N/A	#N/A
the columbian	2015	#N/A	#N/A	#N/A	#N/A	#N/A
the columbian	2016	#N/A	#N/A	#N/A	8	#N/A
the columbian	2017	#N/A	#N/A	#N/A	#N/A	#N/A
daily news	2009	1	#N/A	#N/A	10	1
daily news	2010	#N/A	#N/A	#N/A	10	#N/A
daily news	2011	#N/A	1	#N/A	4	8
daily news	2012	2	#N/A	1	5	#N/A
daily news	2013	1	#N/A	#N/A	9	#N/A
daily news	2014	#N/A	1	#N/A	8	#N/A
daily news	2015	2	#N/A	#N/A	4	3
daily news	2016	#N/A	#N/A	#N/A	13	#N/A
daily news	2017	#N/A	#N/A	#N/A	9	#N/A
the bismarck tribune	2009	9	2	4	24	8
the bismarck tribune	2010	7	3	#N/A	25	7
the bismarck tribune	2011	11	8	1	20	17
the bismarck tribune	2012	4	7	#N/A	16	2
the bismarck tribune	2013	7	8	2	23	11
the bismarck tribune	2014	10	1	1	21	12
the bismarck tribune	2015	3	5	1	11	6
the bismarck tribune	2016	6	1	#N/A	59	7
the bismarck tribune	2017	6	1	2	19	1
lincoln journal star	2009	6	#N/A	1	4	#N/A
lincoln journal star	2010	8	#N/A	1	7	1
lincoln journal star	2011	3	4	#N/A	6	#N/A

## Sheet: DistributionDemographics
np_name	Year	med_white	med_black	med_hisp	med_native	med_spanish	med_industry	med_repub
bangor daily news	2009	95.628	0.522054	1.07452	0.367777	0.114238	1.80151	43.0766
bangor daily news	2010	95.628	0.522054	1.07452	0.367777	0.114238	1.80151	43.0766
bangor daily news	2011	95.628	0.522054	1.07452	0.367777	0.114238	1.80151	43.0766
bangor daily news	2012	95.628	0.522054	1.07452	0.367777	0.114238	1.80151	42.9403
bangor daily news	2013	95.628	0.522054	1.07452	0.367777	0.114238	1.80151	42.9403
bangor daily news	2014	94.828	0.722084	1.41233	0.451723	0.160979	1.97346	42.9403
bangor daily news	2015	94.828	0.722084	1.41233	0.451723	0.160979	1.97346	42.9403
bangor daily news	2016	94.828	0.722084	1.41233	0.451723	0.160979	1.97346	49.3044
bangor daily news	2017	94.828	0.722084	1.41233	0.451723	0.160979	1.97346	49.3044
chicago daily herald	2009	65.7658	6.13541	18.0119	0.189054	7.07686	0.172401	43.12
chicago daily herald	2010	65.7658	6.13541	18.0119	0.189054	7.07686	0.172401	43.12
chicago daily herald	2011	65.7658	6.13541	18.0119	0.189054	7.07686	0.172401	43.12
chicago daily herald	2012	65.7658	6.13541	18.0119	0.189054	7.07686	0.172401	47.5623
chicago daily herald	2013	65.7658	6.13541	18.0119	0.189054	7.07686	0.172401	47.5623
chicago daily herald	2014	63.2038	6.13054	19.2333	0.262429	6.71069	0.180951	47.5623
chicago daily herald	2015	63.2038	6.13054	19.2333	0.262429	6.71069	0.180951	47.5623
chicago daily herald	2016	63.2038	6.13054	19.2333	0.262429	6.71069	0.180951	40.1608
chicago daily herald	2017	63.2038	6.13054	19.2333	0.262429	6.71069	0.180951	40.1608
daily news	2009	78.662	6.14185	7.46361	0.226002	1.84509	0.305481	44.2893
daily news	2010	78.662	6.14185	7.46361	0.226002	1.84509	0.305481	44.2893
daily news	2011	78.662	6.14185	7.46361	0.226002	1.84509	0.305481	44.2893
daily news	2012	78.662	6.14185	7.46361	0.226002	1.84509	0.305481	41.8166
daily news	2013	78.662	6.14185	7.46361	0.226002	1.84509	0.305481	41.8166
daily news	2014	76.0395	6.3305	8.98515	0.230828	2.08923	0.34413	41.8166
daily news	2015	76.0395	6.3305	8.98515	0.230828	2.08923	0.34413	41.8166
daily news	2016	76.0395	6.3305	8.98515	0.230828	2.08923	0.34413	47.3827
daily news	2017	76.0395	6.3305	8.98515	0.230828	2.08923	0.34413	47.3827
dayton daily news	2009	93.6362	2.2187	1.47449	0.157404	0.217434	0.661792	63.9281
dayton daily news	2010	93.6362	2.2187	1.47449	0.157404	0.217434	0.661792	63.9281
dayton daily news	2011	93.6362	2.2187	1.47449	0.157404	0.217434	0.661792	63.9281
dayton daily news	2012	93.6362	2.2187	1.47449	0.157404	0.217434	0.661792	66.87
dayton daily news	2013	93.6362	2.2187	1.47449	0.157404	0.217434	0.661792	66.87
dayton daily news	2014	92.7382	2.36531	1.80006	0.208341	0.356963	0.668185	66.87
dayton daily news	2015	92.7382	2.36531	1.80006	0.208341	0.356963	0.668185	66.87
dayton daily news	2016	92.7382	2.36531	1.80006	0.208341	0.356963	0.668185	70.0412
dayton daily news	2017	92.7382	2.36531	1.80006	0.208341	0.356963	0.668185	70.0412
lincoln journal star	2009	94.0895	0.708873	3.16863	0.24843	1.09457	3.2742	61.2178
lincoln journal star	2010	94.0895	0.708873	3.16863	0.24843	1.09457	3.2742	61.2178
lincoln journal star	2011	94.0895	0.708873	3.16863	0.24843	1.09457	3.2742	61.2178
marin independent journal	2009	69.2455	2.20959	20.3613	0.799602	8.91774	0.906288	22.1409
marin independent journal	2010	69.2455	2.20959	20.3613	0.799602	8.91774	0.906288	22.1409
marin independent journal	2011	69.2455	2.20959	20.3613	0.799602	8.91774	0.906288	22.1409
marin independent journal	2012	69.2455	2.20959	20.3613	0.799602	8.91774	0.906288	24.1299
marin independent journal	2013	69.2455	2.20959	20.3613	0.799602	8.91774	0.906288	24.1299
marin independent journal	2014	67.4321	1.89055	21.2036	0.625695	8.49446	0.876121	24.1299
marin independent journal	2015	67.4321	1.89055	21.2036	0.625695	8.49446	0.876121	24.1299
marin independent journal	2016	67.4321	1.89055	21.2036	0.625695	8.49446	0.876121	18.931
marin independent journal	2017	67.4321	1.89055	21.2036	0.625695	8.49446	0.876121	18.931
providence journal	2009	86.3048	3.56395	4.05964	0.180515	1.09513	0.225223	38.0772
providence journal	2010	86.3048	3.56395	4.05964	0.180515	1.09513	0.225223	38.0772
providence journal	2011	86.3048	3.56395	4.05964	0.180515	1.09513	0.225223	38.0772
providence journal	2012	86.3048	3.56395	4.05964	0.180515	1.09513	0.225223	39.4082
providence journal	2013	86.3048	3.56395	4.05964	0.180515	1.09513	0.225223	39.4082
providence journal	2014	83.861	3.88154	5.15092	0.245113	1.1117	0.214738	39.4082
providence journal	2015	83.861	3.88154	5.15092	0.245113	1.1117	0.214738	39.4082
providence journal	2016	83.861	3.88154	5.15092	0.245113	1.1117	0.214738	38.8805
providence journal	2017	83.861	3.88154	5.15092	0.245113	1.1117	0.214738	38.8805
richmond times dispatch	2009	63.5368	28.7234	3.01055	0.308787	0.858411	0.65989	51.2564
richmond times dispatch	2010	63.5368	28.7234	3.01055	0.308787	0.858411	0.65989	51.2564
richmond times dispatch	2011	63.5368	28.7234	3.01055	0.308787	0.858411	0.65989	51.2564
richmond times dispatch	2012	63.5368	28.7234	3.01055	0.308787	0.858411	0.65989	52.2327
richmond times dispatch	2013	63.5368	28.7234	3.01055	0.308787	0.858411	0.65989	52.2327
richmond times dispatch	2014	62.8146	27.6188	3.4986	0.253403	1.08855	0.721779	52.2327
richmond times dispatch	2015	62.8146	27.6188	3.4986	0.253403	1.08855	0.721779	52.2327
richmond times dispatch	2016	62.8146	27.6188	3.4986	0.253403	1.08855	0.721779	54.5024
richmond times dispatch	2017	62.8146	27.6188	3.4986	0.253403	1.08855	0.721779	54.5024
san bernardino sun	2009	35.7079	7.4762	47.9642	0.953517	14.3906	0.464489	46.8247
san bernardino sun	2010	35.7079	7.4762	47.9642	0.953517	14.3906	0.464489	46.8247
san bernardino sun	2011	35.7079	7.4762	47.9642	0.953517	14.3906	0.464489	46.8247
san bernardino sun	2012	35.7079	7.4762	47.9642	0.953517	14.3906	0.464489	46.5892
san bernardino sun	2013	35.7079	7.4762	47.9642	0.953517	14.3906	0.464489	46.5892
san bernardino sun	2014	32.5617	7.39856	50.6285	0.823487	13.782	0.459719	46.5892
san bernardino sun	2015	32.5617	7.39856	50.6285	0.823487	13.782	0.459719	46.5892
san bernardino sun	2016	32.5617	7.39856	50.6285	0.823487	13.782	0.459719	42.9126
san bernardino sun	2017	32.5617	7.39856	50.6285	0.823487	13.782	0.459719	42.9126
south bend tribune	2009	87.3228	5.14058	5.61315	0.278501	1.66562	0.953804	47.2533
south bend tribune	2010	87.3228	5.14058	5.61315	0.278501	1.66562	0.953804	47.2533
south bend tribune	2011	87.3228	5.14058	5.61315	0.278501	1.66562	0.953804	47.2533
south bend tribune	2012	87.3228	5.14058	5.61315	0.278501	1.66562	0.953804	56.2872
south bend tribune	2013	87.3228	5.14058	5.61315	0.278501	1.66562	0.953804	56.2872
south bend tribune	2014	86.1854	4.95336	6.45488	0.315689	1.64176	0.937187	56.2872
south bend tribune	2015	86.1854	4.95336	6.45488	0.315689	1.64176	0.937187	56.2872
south bend tribune	2016	86.1854	4.95336	6.45488	0.315689	1.64176	0.937187	63.7925
south bend tribune	2017	86.1854	4.95336	6.45488	0.315689	1.64176	0.937187	63.7925
star tribune	2009	92.1044	0.769031	2.28955	0.544683	0.519171	2.12751	48.2028
star tribune	2010	92.1044	0.769031	2.28955	0.544683	0.519171	2.12751	48.2028
star tribune	2011	92.1044	0.769031	2.28955	0.544683	0.519171	2.12751	48.2028
star tribune	2012	92.1044	0.769031	2.28955	0.544683	0.519171	2.12751	51.1218
star tribune	2013	92.1044	0.769031	2.28955	0.544683	0.519171	2.12751	51.1218
star tribune	2014	90.6534	0.946032	2.95277	0.633909	0.616748	2.13562	51.1218
star tribune	2015	90.6534	0.946032	2.95277	0.633909	0.616748	2.13562	51.1218
star tribune	2016	90.6534	0.946032	2.95277	0.633909	0.616748	2.13562	59.3312
star tribune	2017	90.6534	0.946032	2.95277	0.633909	0.616748	2.13562	59.3312
telegram & gazette	2009	84.9545	2.62955	6.83604	0.233867	1.63739	0.428212	35.5066
telegram & gazette	2010	84.9545	2.62955	6.83604	0.233867	1.63739	0.428212	35.5066
telegram & gazette	2011	84.9545	2.62955	6.83604	0.233867	1.63739	0.428212	35.5066
telegram & gazette	2012	84.9545	2.62955	6.83604	0.233867	1.63739	0.428212	36.6229
telegram & gazette	2013	84.9545	2.62955	6.83604	0.233867	1.63739	0.428212	36.6229
telegram & gazette	2014	83.0587	2.78483	7.86946	0.220485	1.35617	0.479651	36.6229
telegram & gazette	2015	83.0587	2.78483	7.86946	0.220485	1.35617	0.479651	36.6229
telegram & gazette	2016	83.0587	2.78483	7.86946	0.220485	1.35617	0.479651	38.7388
telegram & gazette	2017	83.0587	2.78483	7.86946	0.220485	1.35617	0.479651	38.7388
telegraph herald	2009	95.9044	0.349389	1.46035	0.176153	0.401989	4.0242	38.4997
telegraph herald	2010	95.9044	0.349389	1.46035	0.176153	0.401989	4.0242	38.4997
telegraph herald	2011	95.9044	0.349389	1.46035	0.176153	0.401989	4.0242	38.4997
telegraph herald	2012	95.9044	0.349389	1.46035	0.176153	0.401989	4.0242	42.0523
telegraph herald	2013	95.9044	0.349389	1.46035	0.176153	0.401989	4.0242	42.0523
telegraph herald	2014	94.9654	0.922778	1.8181	0.216166	0.461798	3.61279	42.0523
telegraph herald	2015	94.9654	0.922778	1.8181	0.216166	0.461798	3.61279	42.0523
telegraph herald	2016	94.9654	0.922778	1.8181	0.216166	0.461798	3.61279	52.9556
telegraph herald	2017	94.9654	0.922778	1.8181	0.216166	0.461798	3.61279	52.9556
the atlanta journal-constitution	2009	72.5549	17.4382	6.80691	0.268788	3.03716	0.289013	68.776
the atlanta journal-constitution	2010	72.5549	17.4382	6.80691	0.268788	3.03716	0.289013	68.776
the atlanta journal-constitution	2011	72.5549	17.4382	6.80691	0.268788	3.03716	0.289013	68.776
the atlanta journal-constitution	2012	72.5549	17.4382	6.80691	0.268788	3.03716	0.289013	71.1615
the atlanta journal-constitution	2013	72.5549	17.4382	6.80691	0.268788	3.03716	0.289013	71.1615
the atlanta journal-constitution	2014	71.4296	17.5994	7.37586	0.240864	2.71006	0.309786	71.1615
the atlanta journal-constitution	2015	71.4296	17.5994	7.37586	0.240864	2.71006	0.309786	71.1615
the atlanta journal-constitution	2016	71.4296	17.5994	7.37586	0.240864	2.71006	0.309786	69.6775
the atlanta journal-constitution	2017	71.4296	17.5994	7.37586	0.240864	2.71006	0.309786	69.6775
the austin american-statesman	2009	64.7835	6.53303	23.4231	0.523919	4.78372	1.49433	65.0408
the austin american-statesman	2010	64.7835	6.53303	23.4231	0.523919	4.78372	1.49433	65.0408
the austin american-statesman	2011	64.7835	6.53303	23.4231	0.523919	4.78372	1.49433	65.0408
the austin american-statesman	2012	64.7835	6.53303	23.4231	0.523919	4.78372	1.49433	69.6054
the austin american-statesman	2013	64.7835	6.53303	23.4231	0.523919	4.78372	1.49433	69.6054
the austin american-statesman	2014	62.5446	6.35123	24.4364	0.494084	4.849	1.51163	69.6054
the austin american-statesman	2015	62.5446	6.35123	24.4364	0.494084	4.849	1.51163	69.6054
the austin american-statesman	2016	62.5446	6.35123	24.4364	0.494084	4.849	1.51163	72.5916
the austin american-statesman	2017	62.5446	6.35123	24.4364	0.494084	4.849	1.51163	72.5916
the baltimore sun	2009	77.5204	14.2771	4.42439	0.2213	1.63495	0.501946	53.7822
the baltimore sun	2010	77.5204	14.2771	4.42439	0.2213	1.63495	0.501946	53.7822
the baltimore sun	2011	77.5204	14.2771	4.42439	0.2213	1.63495	0.501946	53.7822
the baltimore sun	2012	77.5204	14.2771	4.42439	0.2213	1.63495	0.501946	53.5338
the baltimore sun	2013	77.5204	14.2771	4.42439	0.2213	1.63495	0.501946	53.5338
the baltimore sun	2014	75.2825	14.1875	5.1895	0.194729	1.64406	0.449934	53.5338
the baltimore sun	2015	75.2825	14.1875	5.1895	0.194729	1.64406	0.449934	53.5338
the baltimore sun	2016	75.2825	14.1875	5.1895	0.194729	1.64406	0.449934	54.6036
the baltimore sun	2017	75.2825	14.1875	5.1895	0.194729	1.64406	0.449934	54.6036
the bismarck tribune	2009	94.9019	0.297898	1.51791	1.6061	0.0393924	10.1052	62.714
the bismarck tribune	2010	94.9019	0.297898	1.51791	1.6061	0.0393924	10.1052	62.714
the bismarck tribune	2011	94.9019	0.297898	1.51791	1.6061	0.0393924	10.1052	62.714
the bismarck tribune	2012	94.9019	0.297898	1.51791	1.6061	0.0393924	10.1052	71.0681
the bismarck tribune	2013	94.9019	0.297898	1.51791	1.6061	0.0393924	10.1052	71.0681
the bismarck tribune	2014	92.0692	0.430793	2.36254	1.23839	0.0972894	10.4345	71.0681
the bismarck tribune	2015	92.0692	0.430793	2.36254	1.23839	0.0972894	10.4345	71.0681
the bismarck tribune	2016	92.0692	0.430793	2.36254	1.23839	0.0972894	10.4345	80.259
the bismarck tribune	2017	92.0692	0.430793	2.36254	1.23839	0.0972894	10.4345	80.259
the capital times	2009	92.4305	0.901393	2.80751	0.239753	0.842796	2.29238	38.1314
the capital times	2010	92.4305	0.901393	2.80751	0.239753	0.842796	2.29238	38.1314
the capital times	2011	92.4305	0.901393	2.80751	0.239753	0.842796	2.29238	38.1314
the capital times	2012	92.4305	0.901393	2.80751	0.239753	0.842796	2.29238	42.2376
the capital times	2013	92.4305	0.901393	2.80751	0.239753	0.842796	2.29238	42.2376
the capital times	2014	91.7446	1.00667	3.25508	0.313587	0.863855	2.23703	42.2376
the capital times	2015	91.7446	1.00667	3.25508	0.313587	0.863855	2.23703	42.2376
the capital times	2016	91.7446	1.00667	3.25508	0.313587	0.863855	2.23703	49.8577
the capital times	2017	91.7446	1.00667	3.25508	0.313587	0.863855	2.23703	49.8577
the columbian	2009	83.3608	1.287	7.90111	1.01469	2.05841	0.922665	44.6039
the columbian	2010	83.3608	1.287	7.90111	1.01469	2.05841	0.922665	44.6039
the columbian	2011	83.3608	1.287	7.90111	1.01469	2.05841	0.922665	44.6039
the columbian	2012	83.3608	1.287	7.90111	1.01469	2.05841	0.922665	47.605
the columbian	2013	83.3608	1.287	7.90111	1.01469	2.05841	0.922665	47.605
the columbian	2014	81.382	1.28605	9.05624	1.1866	2.18387	0.759311	47.605
the columbian	2015	81.382	1.28605	9.05624	1.1866	2.18387	0.759311	47.605
the columbian	2016	81.382	1.28605	9.05624	1.1866	2.18387	0.759311	49.0538
the columbian	2017	81.382	1.28605	9.05624	1.1866	2.18387	0.759311	49.0538
the daily oklahoman	2009	78.9953	2.24934	5.75109	4.95804	1.38531	3.06446	70.1761
the daily oklahoman	2010	78.9953	2.24934	5.75109	4.95804	1.38531	3.06446	70.1761
the daily oklahoman	2011	78.9953	2.24934	5.75109	4.95804	1.38531	3.06446	70.1761
the daily oklahoman	2012	78.9953	2.24934	5.75109	4.95804	1.38531	3.06446	72.2737
the daily oklahoman	2013	78.9953	2.24934	5.75109	4.95804	1.38531	3.06446	72.2737
the daily oklahoman	2014	76.7192	2.74962	7.06937	4.77774	1.60064	2.94067	72.2737
the daily oklahoman	2015	76.7192	2.74962	7.06937	4.77774	1.60064	2.94067	72.2737
the daily oklahoman	2016	76.7192	2.74962	7.06937	4.77774	1.60064	2.94067	74.1988
the daily oklahoman	2017	76.7192	2.74962	7.06937	4.77774	1.60064	2.94067	74.1988
the denver post	2009	78.5433	0.893624	14.2209	0.800968	3.00792	2.44571	53.3939
the denver post	2010	78.5433	0.893624	14.2209	0.800968	3.00792	2.44571	53.3939
the denver post	2011	78.5433	0.893624	14.2209	0.800968	3.00792	2.44571	53.3939
the denver post	2012	78.5433	0.893624	14.2209	0.800968	3.00792	2.44571	53.4912
the denver post	2013	78.5433	0.893624	14.2209	0.800968	3.00792	2.44571	53.4912
the denver post	2014	77.7814	1.14855	15.1838	0.723703	3.06146	1.93384	53.4912
the denver post	2015	77.7814	1.14855	15.1838	0.723703	3.06146	1.93384	53.4912
the denver post	2016	77.7814	1.14855	15.1838	0.723703	3.06146	1.93384	55.7463
the denver post	2017	77.7814	1.14855	15.1838	0.723703	3.06146	1.93384	55.7463
the hartford courant	2009	81.3128	5.13246	9.41353	0.244346	1.66988	0.202959	37.8004
the hartford courant	2010	81.3128	5.13246	9.41353	0.244346	1.66988	0.202959	37.8004
the hartford courant	2011	81.3128	5.13246	9.41353	0.244346	1.66988	0.202959	37.8004
the hartford courant	2012	81.3128	5.13246	9.41353	0.244346	1.66988	0.202959	40.7377
the hartford courant	2013	81.3128	5.13246	9.41353	0.244346	1.66988	0.202959	40.7377
the hartford courant	2014	79.4988	5.57929	10.898	0.233678	1.69808	0.32811	40.7377
the hartford courant	2015	79.4988	5.57929	10.898	0.233678	1.69808	0.32811	40.7377
the hartford courant	2016	79.4988	5.57929	10.898	0.233678	1.69808	0.32811	43.8089
the hartford courant	2017	79.4988	5.57929	10.898	0.233678	1.69808	0.32811	43.8089
the morning call	2009	80.2422	4.78817	7.37603	0.161355	1.53318	0.346332	44.8589
the morning call	2010	80.2422	4.78817	7.37603	0.161355	1.53318	0.346332	44.8589
the morning call	2011	80.2422	4.78817	7.37603	0.161355	1.53318	0.346332	44.8589
the morning call	2012	80.2422	4.78817	7.37603	0.161355	1.53318	0.346332	48.7761
the morning call	2013	80.2422	4.78817	7.37603	0.161355	1.53318	0.346332	48.7761
the morning call	2014	77.2916	5.21767	8.85383	0.211069	1.77155	0.397524	48.7761
the morning call	2015	77.2916	5.21767	8.85383	0.211069	1.77155	0.397524	48.7761
the morning call	2016	77.2916	5.21767	8.85383	0.211069	1.77155	0.397524	49.9836
the morning call	2017	77.2916	5.21767	8.85383	0.211069	1.77155	0.397524	49.9836
the santa fe new mexican	2009	39.8961	0.647604	53.4432	4.22394	3.03482	0.770623	23.0034
the santa fe new mexican	2010	39.8961	0.647604	53.4432	4.22394	3.03482	0.770623	23.0034
the santa fe new mexican	2011	39.8961	0.647604	53.4432	4.22394	3.03482	0.770623	23.0034
the santa fe new mexican	2012	39.8961	0.647604	53.4432	4.22394	3.03482	0.770623	22.2623
the santa fe new mexican	2013	39.8961	0.647604	53.4432	4.22394	3.03482	0.770623	22.2623
the tampa tribune	2009	77.8176	9.36269	10.9235	0.309167	2.6904	0.590089	54.2132
the tampa tribune	2010	77.8176	9.36269	10.9235	0.309167	2.6904	0.590089	54.2132
the tampa tribune	2011	77.8176	9.36269	10.9235	0.309167	2.6904	0.590089	54.2132
the tampa tribune	2012	77.8176	9.36269	10.9235	0.309167	2.6904	0.590089	56.7196
the tampa tribune	2013	77.8176	9.36269	10.9235	0.309167	2.6904	0.590089	56.7196
the tampa tribune	2014	74.9315	8.66191	12.8046	0.306841	2.70054	0.488839	56.7196
the tampa tribune	2015	74.9315	8.66191	12.8046	0.306841	2.70054	0.488839	56.7196
the tampa tribune	2016	74.9315	8.66191	12.8046	0.306841	2.70054	0.488839	60.8362
the tampa tribune	2017	74.9315	8.66191	12.8046	0.306841	2.70054	0.488839	60.8362

## Sheet: DistributionViolations
np_name	viol_year	med_dbp	total_dbp	med_lcr	total_lcr	med_coli	total_coli	med_radio	total_radio	med_voc	total_voc
bangor daily news	2009	7	66	1	22	3	58	3	8	42	42
bangor daily news	2010	5.5	45	1.5	13	4	56	2	8	NA	0
bangor daily news	2011	4	52	2	18	5	47	3	14	21	126
bangor daily news	2012	5	35	2.5	20	4.5	68	NA	0	21	21
bangor daily news	2013	NA	0	1	7	4.5	50	2	2	21	42
bangor daily news	2014	2	10	1	3	1	29	1	3	21	21
bangor daily news	2015	NA	0	2	15	2.5	51	1	1	21	21
bangor daily news	2016	NA	0	1.5	9	1	11	1	7	NA	0
bangor daily news	2017	2	7	4	42	NA	0	4.5	17	21	168
chicago daily herald	2009	4.5	26	1	4	5	21	7	27	NA	0
chicago daily herald	2010	5	20	2	18	3	19	3.5	15	NA	0
chicago daily herald	2011	4	14	1.5	9	3	13	5.5	11	NA	0
chicago daily herald	2012	2	14	1.5	8	3	21	1	2	20	20
chicago daily herald	2013	2	15	3	8	2	17	1	2	NA	0
chicago daily herald	2014	4.5	9	2	11	2	7	2	4	NA	0
chicago daily herald	2015	2	8	2	4	3	12	4	4	1	1
chicago daily herald	2016	4	8	1.5	3	2	4	1	2	NA	0
chicago daily herald	2017	2	6	1.5	9	NA	0	1	1	NA	0
daily news	2009	9	1318	2	195	5	675	7	545	21	1058
daily news	2010	4	483	2	130	4	469	8	322	21	1288
daily news	2011	5	534	1	84	5	550	5	352	21	1325
daily news	2012	4	461	2	203	6	669	3	176	21	1207
daily news	2013	2	213	2	156	5	795	6.5	153	21	1207
daily news	2014	3	213	2	107	6	525	5	221	21	976
daily news	2015	4	663	3	178	6	747	5	356	40.5	2232
daily news	2016	4.5	281	3	295	3	328	4	205	21	1189
daily news	2017	3.5	299	2	402	5	209	6.5	315	21	1324
dayton daily news	2009	2	4	1.5	12	1	18	1	1	NA	0
dayton daily news	2010	2	5	2	13	2	25	NA	0	NA	0
dayton daily news	2011	2	15	1	1	1	6	NA	0	21	21
dayton daily news	2012	2	6	1	14	1	14	NA	0	NA	0
dayton daily news	2013	2	5	1	9	2.5	11	NA	0	NA	0
dayton daily news	2014	2	20	1	5	2	16	NA	0	21	21
dayton daily news	2015	NA	0	1	6	1	3	NA	0	21	21
dayton daily news	2016	NA	0	2	16	1	9	NA	0	NA	0
dayton daily news	2017	NA	0	2.5	5	NA	0	NA	0	NA	0
lincoln journal star	2009	NA	0	NA	0	3	62	3.5	7	NA	0
lincoln journal star	2010	NA	0	NA	0	3	66	4.5	9	NA	0
lincoln journal star	2011	NA	0	NA	0	3	57	2.5	5	NA	0
marin independent journal	2009	16	16	2	4	6.5	13	NA	0	1	1
marin independent journal	2010	4	4	5	5	12	12	NA	0	NA	0
marin independent journal	2011	NA	0	NA	0	NA	0	NA	0	NA	0
marin independent journal	2012	7	7	NA	0	NA	0	NA	0	NA	0
marin independent journal	2013	17.5	35	1	1	15.5	31	NA	0	4	4
marin independent journal	2014	NA	0	NA	0	9	9	NA	0	4	4
marin independent journal	2015	NA	0	NA	0	6	12	NA	0	2	2
marin independent journal	2016	8	8	NA	0	1	1	NA	0	28	28
marin independent journal	2017	NA	0	1	1	NA	0	NA	0	NA	0
providence journal	2009	3.5	26	1	10	6.5	98	5	10	63	126
providence journal	2010	1	2	2	16	5	72	14	14	31.5	63
providence journal	2011	1	1	1	2	5.5	22	3	6	21	42
providence journal	2012	5	5	3	8	3	17	NA	0	21	21
providence journal	2013	3	37	3	33	16	285	7	14	64	337
providence journal	2014	2	13	1	2	3	63	2	5	42	42
providence journal	2015	1	1	1	4	7	36	1	1	21	21
providence journal	2016	1	1	2	9	7.5	15	NA	0	NA	0
providence journal	2017	2	8	2	34	4	16	1	4	21	105
richmond times dispatch	2009	2	40	3	24	2	86	7.5	25	21	174
richmond times dispatch	2010	2	28	2	30	2	77	3	18	21	151
richmond times dispatch	2011	3	24	1	25	4	117	3	18	42	277
richmond times dispatch	2012	2	21	1	27	2	86	6	28	42	252
richmond times dispatch	2013	2	19	1	19	2	79	2	21	117.5	235
richmond times dispatch	2014	1	15	1	9	2	93	3	22	21	336
richmond times dispatch	2015	1	2	2	16	2	79	3	12	NA	0
richmond times dispatch	2016	1	4	1	18	1	30	9	9	NA	0
richmond times dispatch	2017	1.5	6	1	9	NA	0	3	13	21	105
san bernardino sun	2009	8	16	3	3	11	22	1	1	NA	0
san bernardino sun	2010	5	5	4	4	9.5	19	2	2	NA	0
san bernardino sun	2011	NA	0	NA	0	NA	0	NA	0	2	2
san bernardino sun	2012	6.5	13	NA	0	NA	0	1	1	NA	0
san bernardino sun	2013	7	7	4.5	9	25	50	3	3	4	4
san bernardino sun	2014	NA	0	16	32	173.5	347	16.5	33	2	2
san bernardino sun	2015	2	2	2	2	9.5	19	12	24	4	4
san bernardino sun	2016	NA	0	1	1	7.5	15	8	16	NA	0
san bernardino sun	2017	NA	0	2	2	1	1	8	16	42	42
south bend tribune	2009	1	1	1.5	3	3	34	NA	0	NA	0
south bend tribune	2010	2	12	1	10	3	32	NA	0	21	42
south bend tribune	2011	2	4	1	2	4.5	38	NA	0	21	21
south bend tribune	2012	1.5	3	1	5	5	54	NA	0	31.5	63
south bend tribune	2013	2.5	5	3	15	4	37	2	2	21	21
south bend tribune	2014	2	2	1	3	6	50	NA	0	21	42
south bend tribune	2015	NA	0	1	4	4	27	3	3	31.5	63
south bend tribune	2016	1	1	1	9	4	20	NA	0	21	42
south bend tribune	2017	1	1	1	2	NA	0	2	2	21	84
star tribune	2009	1	184	1	34	1.5	219	1	25	21	275
star tribune	2010	1	77	1	28	1.5	277	3	59	21	194
star tribune	2011	1	79	1	34	2	247	1	38	42	84
star tribune	2012	1	202	1	104	1	199	3	27	21	21
star tribune	2013	1	110	1	40	2	318	2	19	401	1409
star tribune	2014	1	686	2	141	1	287	10	26	43	210
star tribune	2015	1	314	1	74	2	234	3	34	21	42
star tribune	2016	1	126	1	39	1	126	4	36	22	212
star tribune	2017	1	162	1	60	NA	0	1	11	63	63
telegram & gazette	2009	6	25	5	18	10	131	6.5	29	42	168
telegram & gazette	2010	2	13	3	14	4	80	6	26	42	104
telegram & gazette	2011	1	1	1	10	12	24	15.5	31	51	102
telegram & gazette	2012	3.5	7	1	2	2	22	3.5	7	11	22
telegram & gazette	2013	4	61	3	41	18	384	3	40	61.5	753
telegram & gazette	2014	1	11	4	21	8	97	2.5	17	42	273
telegram & gazette	2015	1	1	2	10	8.5	68	3	26	21	42
telegram & gazette	2016	1	2	12.5	85	5	32	3	10	21	21
telegram & gazette	2017	1	5	6	49	5	5	3.5	7	21	21
telegraph herald	2009	1	7	1	4	3.5	47	2.5	16	7	31
telegraph herald	2010	4	17	2	2	2	19	3	9	NA	0
telegraph herald	2011	2	5	NA	0	2	12	1	1	NA	0
telegraph herald	2012	2	10	4	25	2	14	1.5	16	NA	0
telegraph herald	2013	1	6	1	2	2	13	2	7	21	61
telegraph herald	2014	1.5	3	4	17	1	11	1	1	11	22
telegraph herald	2015	1	3	1	6	1	5	7	14	1	1
telegraph herald	2016	2.5	10	2	4	1.5	8	2	8	NA	0
telegraph herald	2017	NA	0	2	2	NA	0	1	2	NA	0
the atlanta journal-constitution	2009	1	5	1	10	2	74	4	8	NA	0
the atlanta journal-constitution	2010	2	13	1	2	3	108	3	8	NA	0
the atlanta journal-constitution	2011	1	2	2	8	1	53	2	10	NA	0
the atlanta journal-constitution	2012	1	1	1	15	1	41	1	2	NA	0
the atlanta journal-constitution	2013	1	4	1	12	2	61	3.5	7	NA	0
the atlanta journal-constitution	2014	NA	0	1	11	3	77	NA	0	NA	0
the atlanta journal-constitution	2015	NA	0	1	12	1	48	8	45	NA	0
the atlanta journal-constitution	2016	NA	0	1	19	1	34	4	13	NA	0
the atlanta journal-constitution	2017	2	2	1	11	NA	0	3	56	NA	0
the austin american-statesman	2009	18	838	NA	0	10	295	18	106	21	64
the austin american-statesman	2010	5.5	102	NA	0	5	79	7	30	NA	0
the austin american-statesman	2011	11.5	82	NA	0	2	30	8	60	21	105
the austin american-statesman	2012	5	60	NA	0	1	3	13	37	NA	0
the austin american-statesman	2013	3	32	3	65	NA	0	3	21	21	21
the austin american-statesman	2014	8	221	4.5	105	5	104	8.5	116	42	168
the austin american-statesman	2015	3	12	1	1	NA	0	NA	0	NA	0
the austin american-statesman	2016	6	12	1	1	NA	0	NA	0	NA	0
the austin american-statesman	2017	11	276	18	521	6	141	10	194	21	210
the baltimore sun	2009	9.5	50	2	84	4	146	4	13	21	164
the baltimore sun	2010	5	89	2	23	6	232	5	16	30	60
the baltimore sun	2011	4	100	2	17	5	127	2	19	11	22
the baltimore sun	2012	3	27	2	53	2	102	5.5	11	40	40
the baltimore sun	2013	2.5	16	1	28	2.5	109	3	6	NA	0
the baltimore sun	2014	2.5	9	4	84	4.5	95	4.5	9	21	21
the baltimore sun	2015	24	79	2.5	37	4.5	120	3.5	16	120	240
the baltimore sun	2016	2	19	2	51	5	38	3	3	21	459
the baltimore sun	2017	4	12	2	53	NA	0	4	24	20	40
the bismarck tribune	2009	2	11	NA	0	3	11	NA	0	NA	0
the bismarck tribune	2010	1.5	10	1	2	1	4	NA	0	NA	0
the bismarck tribune	2011	1	6	1	5	1	12	NA	0	NA	0
the bismarck tribune	2012	1	11	1.5	3	1	9	NA	0	NA	0
the bismarck tribune	2013	1	7	1	5	2	8	NA	0	NA	0
the bismarck tribune	2014	1	7	1	8	2	11	NA	0	NA	0
the bismarck tribune	2015	1.5	16	1	1	1	6	NA	0	NA	0
the bismarck tribune	2016	1.5	6	1	2	1.5	3	NA	0	NA	0
the bismarck tribune	2017	1	9	2	2	NA	0	NA	0	NA	0
the capital times	2009	2	9	1	4	2	47	2	27	21	105
the capital times	2010	4	45	1	4	2	38	3	39	21	84
the capital times	2011	2	27	1	3	2	40	3	8	21	21
the capital times	2012	2	11	4	54	2	25	4	15	21	42
the capital times	2013	1	12	2	17	2	36	3	6	21	21
the capital times	2014	1	10	4.5	107	1	23	3.5	7	1	1
the capital times	2015	1	13	1.5	18	2	24	2	17	42	42
the capital times	2016	2	14	1.5	19	2	19	4	4	NA	0
the capital times	2017	1	3	3	16	NA	0	2.5	16	NA	0
the columbian	2009	6	6	NA	0	24	24	NA	0	40	105
the columbian	2010	2	2	1	1	10	10	NA	0	30	102
the columbian	2011	5	5	3	3	5	5	NA	0	80	565
the columbian	2012	5	5	NA	0	2	4	4	4	10.5	21
the columbian	2013	6	6	NA	0	3	23	3	3	20	62
the columbian	2014	NA	0	1	1	1	5	2	2	20	42
the columbian	2015	NA	0	1	2	2	5	NA	0	1	1
the columbian	2016	NA	0	1	1	1.5	3	NA	0	10.5	21
the columbian	2017	NA	0	5	19	NA	0	NA	0	60	120
the daily oklahoman	2009	15	113	NA	0	4	116	3	10	42	383
the daily oklahoman	2010	8.5	65	6	87	7	156	8	73	42	258
the daily oklahoman	2011	6	66	3	32	11	265	7.5	65	42	129
the daily oklahoman	2012	2	48	3	28	8	169	9	9	21	132
the daily oklahoman	2013	3.5	56	3.5	19	5	155	2	7	21	46
the daily oklahoman	2014	2	16	2	13	10	184	12	82	21	129
the daily oklahoman	2015	4	53	4	31	7	136	4	22	21	232
the daily oklahoman	2016	2	34	2	16	3	32	8	60	31.5	315
the daily oklahoman	2017	7	99	3	51	NA	0	16	110	42	294
the denver post	2009	2	114	1	30	2	138	3	46	40	527
the denver post	2010	3	127	1	20	2	66	3	64	21	315
the denver post	2011	2	91	2	36	1.5	65	3	49	21	354
the denver post	2012	2	28	1	2	1.5	12	1	15	21	126
the denver post	2013	2	25	1	3	2	4	2	17	21	252
the denver post	2014	4	4	NA	0	NA	0	3	23	21	188
the denver post	2015	8	291	2	73	4	243	4	140	21	462
the denver post	2016	2	89	1	22	2	41	4	69	21	252
the denver post	2017	3	90	2	87	NA	0	4	79	21	441
the hartford courant	2009	2	18	1	7	10.5	98	7	45	40	141
the hartford courant	2010	2	14	2	14	6.5	77	7	28	20	121
the hartford courant	2011	2.5	16	1	3	13	123	7	61	40	220
the hartford courant	2012	5	33	1	6	12	88	3	17	30	180
the hartford courant	2013	2	18	2	15	10.5	99	3	9	21	161
the hartford courant	2014	1	5	2	26	8	75	4	32	21	81
the hartford courant	2015	2	11	4	21	7	66	5	24	40	120
the hartford courant	2016	2	9	10	99	5.5	46	6	22	20	141
the hartford courant	2017	2	21	13.5	150	NA	0	6.5	58	30	120
the morning call	2009	8	209	1	9	5	88	4	60	21	405
the morning call	2010	3	131	4	13	3	82	7.5	49	40	604
the morning call	2011	4.5	137	1	13	5	125	13	50	20	440
the morning call	2012	2	17	1	4	2	23	NA	0	20	324
the morning call	2013	1	1	NA	0	6	12	NA	0	NA	0
the morning call	2014	2	12	NA	0	2	4	3	6	NA	0
the morning call	2015	24.5	485	4	68	17	309	5.5	232	100	1478
the morning call	2016	6.5	149	5.5	89	4	74	5	75	20	360
the morning call	2017	7.5	171	2	49	NA	0	8	118	20	361
the santa fe new mexican	2009	1	1	4	19	5	31	4	36	NA	0
the santa fe new mexican	2010	3.5	7	1	5	4	21	6	20	31.5	106
the santa fe new mexican	2011	2	9	11	45	9	59	33.5	120	84	547
the santa fe new mexican	2012	12	61	3.5	14	9	56	12	45	11	22
the santa fe new mexican	2013	6	27	1	6	11	63	9	22	NA	0
the tampa tribune	2009	7.5	103	6	25	6	107	NA	0	NA	0
the tampa tribune	2010	4.5	67	1	13	4.5	69	4.5	9	NA	0
the tampa tribune	2011	3.5	68	3	11	3	86	NA	0	NA	0
the tampa tribune	2012	13	121	2	14	8	83	NA	0	NA	0
the tampa tribune	2013	6	53	1	4	9.5	92	2	2	NA	0
the tampa tribune	2014	2	2	1	5	6	80	10	10	NA	0
the tampa tribune	2015	2	2	1.5	8	4	35	10	10	NA	0
the tampa tribune	2016	NA	0	2	11	1.5	13	4	8	NA	0
the tampa tribune	2017	NA	0	1.5	22	NA	0	3.5	7	NA	0
