# Supplementary material for: Pollution in the Press: Employing Text Analytics to Understand Regional Water Quality Narratives
Source: Frontiers journal article supplement (doi:10.3389/fenvs.2022.770812), 2022-04-27
Supplement: Data_Sheet_2.PDF [file Data_Sheet_2.PDF]

# Supplementary Material

## 1 SUPPLEMENTARY TABLES AND FIGURES

| Newspaper Name                   | Headquarters (City) | USEPA Headquarters | Article Count for 5 SDWA Rules | Article Count for all SDWA Rules |
|----------------------------------|---------------------|--------------------|--------------------------------|----------------------------------|
| Bangor Daily News                | Bangor, ME          | Region 1           | 410                            | 706                              |
| Chicago Daily Herald             | Chicago, IL         | Region 5           | 740                            | 1110                             |
| Daily News                       | New York City, NY   | Region 2           | 93                             | 235                              |
| Dayton Daily News                | Dayton, OH          | Region 5           | 1073                           | 1273                             |
| Lincoln Journal Star             | Lincoln, NE         | Region 7           | 41                             | 85                               |
| Marin Independent Journal        | San Rafael, CA      | Region 9           | 135                            | 280                              |
| Providence Journal               | Providence, RI      | Region 1           | 263                            | 383                              |
| Richmond Times Dispatch          | Richmond, VA        | Region 3           | 235                            | 403                              |
| San Bernardino Sun               | San Bernardino, CA  | Region 9           | 162                            | 320                              |
| South Bend Tribune               | South Bend, IN      | Region 5           | 110                            | 193                              |
| Star Tribune                     | Minneapolis, MN     | Region 5           | 447                            | 733                              |
| Telegram & Gazette               | Worcester, MA       | Region 1           | 398                            | 567                              |
| Telegraph Herald                 | Dubuque, IA         | Region 7           | 413                            | 620                              |
| The Atlanta Journal-Constitution | Atlanta, GA         | Region 4           | 214                            | 461                              |
| The Austin Statesman             | Austin, TX          | Region 6           | 197                            | 341                              |
| The Baltimore Sun                | Baltimore, MD       | Region 3           | 352                            | 588                              |
| The Bismarck Tribune             | Bismarck, ND        | Region 8           | 399                            | 655                              |
| The Capital Times                | Madison, WV         | Region 3           | 59                             | 106                              |
| The Columbian                    | Vancouver, WA       | Region 10          | 12                             | 20                               |
| The Daily Oklahoman              | Oklahoma City, OK   | Region 6           | 238                            | 447                              |
| The Denver Post                  | Denver, CO          | Region 8           | 582                            | 741                              |
| The Hartford Courant             | Hartford, CT        | Region 1           | 256                            | 381                              |
| The Morning Call                 | Allentown, PA       | Region 3           | 227                            | 332                              |
| The Santa Fe New Mexican         | Santa Fe, NM        | Region 6           | 165                            | 207                              |
| The Tampa Tribune                | Tampa, FL           | Region 4           | 190                            | 375                              |

**Table S1.** Newspaper Name, Headquarters, USEPA region, Article count for five SDWA rules and total water-related article counts for newspapers in analyses. News coverage in this dataset represented all ten USEPA regions, with variable frequency of water-related news.

| SDWA Rule                              | Rule History                                                                                                                                                                | Regulated Contaminants                                                                                                                                                                                                                                                                                    |
|----------------------------------------|-----------------------------------------------------------------------------------------------------------------------------------------------------------------------------|-----------------------------------------------------------------------------------------------------------------------------------------------------------------------------------------------------------------------------------------------------------------------------------------------------------|
| Lead and Copper Rule (LCR)             | 1991. Revised in 2007 to augment monitoring, treatment, communication, and LSL replacement.                                                                                 | Lead and Copper                                                                                                                                                                                                                                                                                           |
| Disinfection Byproducts (DBPs) Rule    | 1998. Revised in 2006 to include stage 2 DBPs.                                                                                                                              | Stage 1: Chlorine, chloramine, chlorine dioxide, chlorite, bromate, total haloacetic acids (HAA5), total carbon, trihalomethanes (TTHM)<br>Stage 2: HAA5, TTHM                                                                                                                                            |
| Radionuclides Rule                     | 1989. Additional contaminants listed in 1992 and 1994.                                                                                                                      | Gross alpha, uranium, radium (-226 and 228), gross beta particle activity, manmade beta particle and photon emitter, tritium, 38-strontium-90, 53-iodine-131                                                                                                                                              |
| Volatile Organic Chemicals (VOCs) Rule | 1977. Revised in 2000 to strengthen monitoring for CWSs, establish a uranium standard, and includes 3 new analytical methods.                                               | 1,2,4-Trichlorobenzene, cis-1,2-dichloroethylene, total xylenes, dichloromethane, o-dichlorobenzene, p-dichlorobenzene, vinyl chloride, 1,1-dichloroethylene, 1,1,1-trichloroethane, carbon tetrachloride, 1,2-dichloropropane, trichloroethylene, chlorobenzene, benzene, toluene, ethylbenzene, styrene |
| Total Coliform Rule                    | 1989. Revised Total Coliform Rule (RTCR) was published in 2013. All PWSs must comply with the RTCR before 2016. Until then, PWSs must continue complying with the 1989 TCR. | Total Coliform                                                                                                                                                                                                                                                                                            |

**Table S2.** SDWA Rule, history, and regulated contaminants. Rules were introduced and revised at variable times throughout 1977 - 2016.

| SDWA Rule | Slope  | p-value |
|-----------|--------|---------|
| LCR       | 0.146  | 0.101   |
| DBP       | 0.04   | 0.01    |
| RN        | -0.02  | 0.007   |
| VOC       | -0.01  | 0.07    |
| TCR       | -0.001 | 0.05    |

**Table S3.** Slope and p-values of annual SDWA rule coverage from 2009 - 2017. There was a rise in LCR and DBP coverage and decline in RN, VOC, and TCR

| Parameter                   | LCR<br>Beta | 95 %<br>CI           | DBP<br>Beta | 95%<br>CI              | RN<br>Beta | 95%<br>CI    | VOC<br>Beta | 95%<br>CI            | TCR<br>Beta | 95%<br>CI             |
|-----------------------------|-------------|----------------------|-------------|------------------------|------------|--------------|-------------|----------------------|-------------|-----------------------|
| Total Violations            | -0.04       | -0.10 - 0.48         | -4.4 x E-3  | -9.86 xE-3 - 2.20 xE-3 | -1.2 x E-3 | -0.04 - 0.16 | -5.4 xE-4   | -4.1 xE-3 - 5.7 xE-3 | -1.9 x E-3  | -6.21 xE-3 - 1.4 xE-2 |
| Non-Hispanic White          | 2.24        | <b>0.53 - 5.17</b>   | 0.68        | -0.86 - 1.63           | -0.29      | -0.56 - 0.19 | 0.08        | -0.19 - 0.27         | 0.16        | <b>0.05 - 0.25</b>    |
| Black                       | -2.01       | -18.8 - 7.42         | -0.86       | -4.33 - 0.99           | 0.84       | -0.84 - 3.67 | -0.18       | -0.45 - 1.68         | -0.32       | -0.89 - 0.04          |
| Hispanic                    | -1.22       | <b>-6.58 - -0.41</b> | -0.25       | -1.77 - 0.85           | 0.30       | -0.22 - 0.43 | -0.07       | -0.35 - 0.23         | -0.16       | -0.30 - 0.40          |
| American Indian             | -5.00       | -154 - 42.9          | 7.81        | -53.2 - 20.5           | -0.43      | -20.3 - 33.4 | 1.88        | -101 - 19.9          | -0.64       | -12.5 - 2.7           |
| Spanish-Speaking Households | -6.65       | -39.5 - 46.6         | -2.55       | -5.74 - 10.9           | -0.48      | -1.10 - 5.26 | 0.70        | -3.99 - 1.56         | -0.61       | -1.65 - 1.76          |
| Industrial Employment       | 8.56        | -56.1 - 43.0         | 2.87        | -3.58 - 16.1           | 5.94       | -7.83 - 10.1 | 3.03        | -2.84 - 3.55         | 0.20        | -3.33 - 1.73          |
| Republican Voters           | -0.48       | -2.64 - 2.42         | 0.59        | <b>0.33 - 1.03</b>     | 0.14       | -0.18 - 0.51 | 0.13        | -0.10 - 0.26         | 0           | -0.26 - 0.08          |

**Table S4.** Univariate quantile regression results from sociodemographic parameters on SDWA Rule coverage. Generally, news coverage in more non-Hispanic white regions had a positive direction, while more Black and Hispanic populations had negative directionality. The proportion of American Indian populations had variable direction. Total violations had no effect on news coverage of SDWA rules.

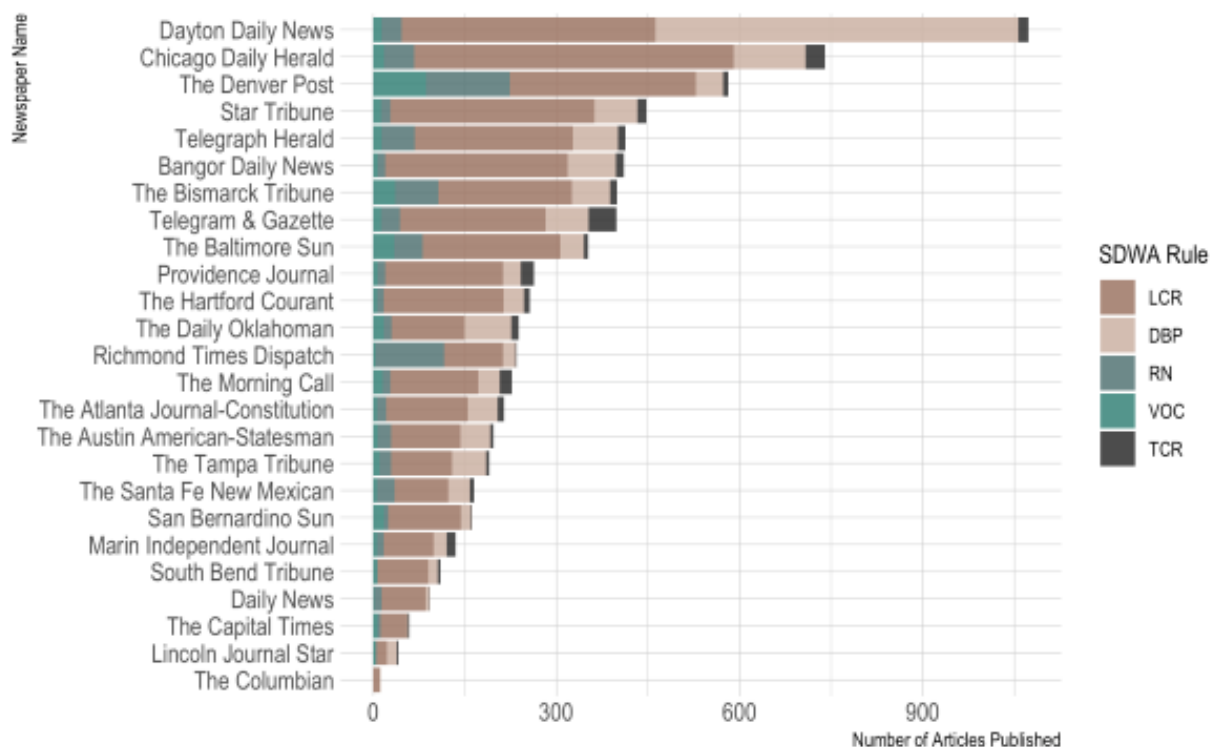

**Figure S1.** Number of Article publications by newspaper outlet and SDWA Rule mentioned. LCR was covered most frequently among nearly all newspapers, except for the Richmond Times Dispatch, Lincoln Journal Star, and Dayton Daily News.
